# Supplementary material for: Rainfall-runoff modelling using river-stage time series in the absence of reliable discharge information: a case study in the semi-arid Mara River basin
Source: Copernicus journal article supplement (doi:10.5194/hess-22-5081-2018), 2018-10-02
Supplement: Supplementary file 1 [file hess-22-5081-2018-supplement.zip]

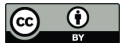

## *Supplement of*

# **Rainfall-runoff modelling using river-stage time series in the absence of reliable discharge information: a case study in the semi-arid Mara River basin**

**Petra Hulsman et al.**

*Correspondence to:* Petra Hulsman (p.hulsman@tudelft.nl)

- hess-22-5081-2018-supplement-title-page.pdf
- Supplements.pdf
- Supporting data v2.xlsx

The copyright of individual parts of the supplement might differ from the CC BY 4.0 License.
