# Supplementary material for: Rainfall-runoff modelling using river-stage time series in the absence of reliable discharge information: a case study in the semi-arid Mara River basin
Source: Copernicus journal article supplement (doi:10.5194/hess-22-5081-2018), 2018-10-02
Supplement: Supplementary file 1 [file Supporting data v2.xlsx]

## Sheet: Station characteristics
Name	Station ID	LAT	LON	Start	End	Temporal coverage	Type
Nyangores	1LA03	-0.789861	35.3465	1963-10-23	2015-03-17	0.854693	Discharge, water level
Kapkimolwa	1LB02	-0.898953	35.4374	1955-09-21	2015-03-17	0.722432	Discharge, water level
Mines	5H2	-1.548	34.554	1969-08-15	2012-06-30	0.526531	Discharge, water level
MUSOMA	637330	-1.5	33.8	1960-01-13	2014-06-19	0.316115	Temperature
NAROK	637370	-1.133	35.833	1961-01-01	2014-06-19	0.350471	Temperature
KISII	637090	-0.667	34.783	1985-01-01	2014-06-19	0.422412	Temperature
KERICHO	637100	-0.367	35.267	1977-05-28	2014-06-05	0.394513	Temperature
NAKURU	637140	-0.267	36.1	1957-01-01	2014-06-19	0.728382	Temperature
DANSON K.NGUGI SAW MILL,ELBURG.	9035031	-0.38333	35.8	1959-03-01	1987-03-25	0.752536	Precipitation
MULOT POLICE POST	9035284/60682	-0.93333	35.4333	1969-01-01	2015-07-31	0.355963	Precipitation
NAIKARA AFRICA GOSPEL CHURCH	9135022/60754	-1.55	35.6333	1970-01-02	1988-10-30	0.898357	Precipitation
Baraget forest station	60652/9035241	-0.42	35.73	1969-12-27	1992-12-08	1	Precipitation
SOTIK, TENWIK MISSION	9035079/60579	-0.75	35.3667	1970-01-02	1983-12-28	0.98121	Precipitation
SOTIK,KABOSON GOSPEL MISSION	9135008/60745	-1	35.2333	1970-01-02	1986-08-27	0.864683	Precipitation
SOTIK, AITONG VET. HOUSE	9135010/60747	-1.18333	35.25	1981-01-01	1997-07-26	0.698232	Precipitation
NAROK,KEEKOROK GAME LODGE	9135013/60750	-1.58333	35.2333	1970-01-02	1997-07-25	0.971491	Precipitation
KICHWA TEMBO CAMP	9135035/60761	-1.23333	35.0167	1988-01-01	2002-12-31	0.677496	Precipitation
NAROTIA FOREST STATION	9035303/60699	-0.76666	35.5333	1979-08-01	2015-06-29	0.530304	Precipitation
NYANGORES FOREST STATION	9035302/60698	-0.7	35.4333	1979-08-10	2014-11-30	0.415368	Precipitation
SOTIK WATER SUPPLY	9035264/60670	-0.683333	35.1167	1965-04-06	2004-06-29	0.841382	Precipitation
BOMET WATER SUPPLY	9035265/60671	-0.783333	35.35	1965-09-01	2008-04-29	0.720126	Precipitation
OLEGURUOE D.O'S OFFICE	9035085	-0.583333	35.6833	1960-01-01	2002-09-24	0.836622	Precipitation
TALEK CAMP NAROK	9135012/60749	-1.45	35.25	1988-07-27	2011-12-31	0.988549	Precipitation
MARA SERENA LODGE	9135030/60758	-1.25	35.1167	2008-06-27	2011-12-31	0.990647	Precipitation
GOVERNOR'S CAMP	9135026/60756	-1.28333	35.0833	2011-05-01	2011-08-30	1	Precipitation
SOTIK DIV AGRI OFFICE	9134011/60727	-1	34.8833	1970-01-02	1988-12-30	0.933987	Precipitation
TARANGANYA SEC. SCHOOL	9134012/60728	-1.23333	34.6	1983-10-18	1990-01-31	0.852045	Precipitation
LOLGORIEN POLICE POST	9134027/60734	-1.23333	34.8167	1981-12-01	1987-01-30	0.563328	Precipitation
ENTASEKERA CHIEF'S CAMP	9135020/60753	-1.83333	35.8333	1986-09-01	1992-12-31	0.525497	Precipitation
NTIMARU CHIEF'S OFFICE	9134019/60731	-1.33333	34.6833	1959-02-01	2000-10-31	0.882353	Precipitation
BUHEMBA TR.CENTRE	9134029/90172	-1.76667	34.0833	1970-01-02	1997-12-31	0.904557	Precipitation
KISAKA NGURUIME	9134016/90173	-1.56667	34.4667	1970-09-01	1979-04-24	0.642179	Precipitation
MUSOMA MET.	9133000/90045	-1.5	33.8	1970-01-29	1974-12-31	0.0812013	Precipitation
NYABANGI MISSION	9133004/90049	-1.55	33.8667	1970-01-02	1994-11-28	0.916236	Precipitation
TARIME HYDROMET	9134026/90062	-1.33333	34.3333	1970-01-02	1994-12-28	0.659801	Precipitation
MUGUMU PRIMARY SCHOOL	9134033/90063	-1.86667	34.7167	1970-01-02	1997-12-31	0.964209	Precipitation

## Sheet: Discharge
Discharge [m3/s]	Nyangores 1LA03	Amala 1LB02	Mines 5H2
1955-09-21	To receive the data in order to verify the analysis and model results of this paper, please feel free contact us (T.A.Bogaard@tudelft.nl).
1955-09-22
1955-09-23
1955-09-24
1955-09-25
1955-09-26
1955-09-27
1955-09-28
1955-09-29
1955-09-30
1955-10-01
1955-10-02
1955-10-03
1955-10-04
1955-10-05
1955-10-06
1955-10-07
1955-10-08
1955-10-09
1955-10-10
1955-10-11
1955-10-12
1955-10-13
1955-10-14
1955-10-15
1955-10-16
1955-10-17
1955-10-18
1955-10-19
1955-10-20
1955-10-21
1955-10-22
1955-10-23
1955-10-24
1955-10-25
1955-10-26
1955-10-27
1955-10-28
1955-10-29
1955-10-30
1955-10-31
1955-11-01
1955-11-02
1955-11-03
1955-11-04
1955-11-05
1955-11-06
1955-11-07
1955-11-08
1955-11-09
1955-11-10
1955-11-11
1955-11-12
1955-11-13
1955-11-14
1955-11-15
1955-11-16
1955-11-17
1955-11-18
1955-11-19
1955-11-20
1955-11-21
1955-11-22
1955-11-23
1955-11-24
1955-11-25
1955-11-26
1955-11-27
1955-11-28
1955-11-29
1955-11-30
1955-12-01
1955-12-02
1955-12-03
1955-12-04
1955-12-05
1955-12-06
1955-12-07
1955-12-08
1955-12-09
1955-12-10
1955-12-11
1955-12-12
1955-12-13
1955-12-14
1955-12-15
1955-12-16
1955-12-17
1955-12-18
1955-12-19
1955-12-20
1955-12-21
1955-12-22
1955-12-23
1955-12-24
1955-12-25
1955-12-26
1955-12-27
1955-12-28
1955-12-29
1955-12-30
1955-12-31
1956-01-01
1956-01-02
1956-01-03
1956-01-04
1956-01-05
1956-01-06
1956-01-07
1956-01-08
1956-01-09
1956-01-10
1956-01-11
1956-01-12
1956-01-13
1956-01-14
1956-01-15
1956-01-16
1956-01-17
1956-01-18
1956-01-19
1956-01-20
1956-01-21
1956-01-22
1956-01-23
1956-01-24
1956-01-25
1956-01-26
1956-01-27
1956-01-28
1956-01-29
1956-01-30
1956-01-31
1956-02-01
1956-02-02
1956-02-03
1956-02-04
1956-02-05
1956-02-06
1956-02-07
1956-02-08
1956-02-09
1956-02-10
1956-02-11
1956-02-12
1956-02-13
1956-02-14
1956-02-15
1956-02-16
1956-02-17
1956-02-18
1956-02-19
1956-02-20
1956-02-21
1956-02-22
1956-02-23
1956-02-24
1956-02-25
1956-02-26
1956-02-27
1956-02-28
1956-02-29
1956-03-01
1956-03-02
1956-03-03
1956-03-04
1956-03-05
1956-03-06
1956-03-07
1956-03-08
1956-03-09
1956-03-10
1956-03-11
1956-03-12
1956-03-13
1956-03-14
1956-03-15
1956-03-16
1956-03-17
1956-03-18
1956-03-19
1956-03-20
1956-03-21
1956-03-22
1956-03-23
1956-03-24
1956-03-25
1956-03-26
1956-03-27
1956-03-28
1956-03-29
1956-03-30
1956-03-31
1956-04-01
1956-04-02
1956-04-03
1956-04-04
1956-04-05
1956-04-06
1956-04-07
1956-04-08
1956-04-09
1956-04-10
1956-04-11
1956-04-12
1956-04-13
1956-04-14
1956-04-15
1956-04-16
1956-04-17
1956-04-18
1956-04-19
1956-04-20
1956-04-21
1956-04-22
1956-04-23
1956-04-24
1956-04-25
1956-04-26
1956-04-27
1956-04-28
1956-04-29
1956-04-30
1956-05-01
1956-05-02
1956-05-03
1956-05-04
1956-05-05
1956-05-06
1956-05-07
1956-05-08
1956-05-09
1956-05-10
1956-05-11
1956-05-12
1956-05-13
1956-05-14
1956-05-15
1956-05-16
1956-05-17
1956-05-18
1956-05-19
1956-05-20
1956-05-21
1956-05-22
1956-05-23
1956-05-24
1956-05-25
1956-05-26
1956-05-27
1956-05-28
1956-05-29
1956-05-30
1956-05-31
1956-06-01
1956-06-02
1956-06-03
1956-06-04
1956-06-05
1956-06-06
1956-06-07
1956-06-08
1956-06-09
1956-06-10
1956-06-11
1956-06-12
1956-06-13
1956-06-14
1956-06-15
1956-06-16
1956-06-17
1956-06-18
1956-06-19
1956-06-20
1956-06-21
1956-06-22
1956-06-23
1956-06-24
1956-06-25
1956-06-26
1956-06-27
1956-06-28
1956-06-29
1956-06-30
1956-07-01
1956-07-02
1956-07-03
1956-07-04
1956-07-05
1956-07-06
1956-07-07
1956-07-08
1956-07-09
1956-07-10
1956-07-11
1956-07-12
1956-07-13
1956-07-14
1956-07-15
1956-07-16
1956-07-17
1956-07-18
1956-07-19
1956-07-20
1956-07-21
1956-07-22
1956-07-23
1956-07-24
1956-07-25
1956-07-26
1956-07-27
1956-07-28
1956-07-29
1956-07-30
1956-07-31
1956-08-01
1956-08-02
1956-08-03
1956-08-04
1956-08-05
1956-08-06
1956-08-07
1956-08-08
1956-08-09
1956-08-10
1956-08-11
1956-08-12
1956-08-13
1956-08-14
1956-08-15
1956-08-16
1956-08-17
1956-08-18
1956-08-19
1956-08-20
1956-08-21
1956-08-22
1956-08-23
1956-08-24
1956-08-25
1956-08-26
1956-08-27
1956-08-28
1956-08-29
1956-08-30
1956-08-31
1956-09-01
1956-09-02
1956-09-03
1956-09-04
1956-09-05
1956-09-06
1956-09-07
1956-09-08
1956-09-09
1956-09-10
1956-09-11
1956-09-12
1956-09-13
1956-09-14
1956-09-15
1956-09-16
1956-09-17
1956-09-18
1956-09-19
1956-09-20
1956-09-21
1956-09-22
1956-09-23
1956-09-24
1956-09-25
1956-09-26
1956-09-27
1956-09-28
1956-09-29
1956-09-30
1956-10-01
1956-10-02
1956-10-03
1956-10-04
1956-10-05
1956-10-06
1956-10-07
1956-10-08
1956-10-09
1956-10-10
1956-10-11
1956-10-12
1956-10-13
1956-10-14
1956-10-15
1956-10-16
1956-10-17
1956-10-18
1956-10-19
1956-10-20
1956-10-21
1956-10-22
1956-10-23
1956-10-24
1956-10-25
1956-10-26
1956-10-27
1956-10-28
1956-10-29
1956-10-30
1956-10-31
1956-11-01
1956-11-02
1956-11-03
1956-11-04
1956-11-05
1956-11-06
1956-11-07
1956-11-08
1956-11-09
1956-11-10
1956-11-11
1956-11-12
1956-11-13
1956-11-14
1956-11-15
1956-11-16
1956-11-17
1956-11-18
1956-11-19
1956-11-20
1956-11-21
1956-11-22
1956-11-23
1956-11-24
1956-11-25
1956-11-26
1956-11-27
1956-11-28
1956-11-29
1956-11-30
1956-12-01
1956-12-02
1956-12-03
1956-12-04
1956-12-05
1956-12-06
1956-12-07
1956-12-08
1956-12-09
1956-12-10
1956-12-11
1956-12-12
1956-12-13
1956-12-14
1956-12-15
1956-12-16
1956-12-17
1956-12-18
1956-12-19
1956-12-20
1956-12-21
1956-12-22
1956-12-23
1956-12-24
1956-12-25
1956-12-26
1956-12-27
1956-12-28
1956-12-29
1956-12-30
1956-12-31
1957-01-01
1957-01-02
1957-01-03
1957-01-04
1957-01-05
1957-01-06
1957-01-07
1957-01-08
1957-01-09
1957-01-10
1957-01-11
1957-01-12
1957-01-13
1957-01-14
1957-01-15
1957-01-16
1957-01-17
1957-01-18
1957-01-19
1957-01-20
1957-01-21
1957-01-22
1957-01-23
1957-01-24
1957-01-25
1957-01-26
1957-01-27
1957-01-28
1957-01-29
1957-01-30
1957-01-31
1957-02-01
1957-02-02
1957-02-03
1957-02-04
1957-02-05
1957-02-06
1957-02-07
1957-02-08
1957-02-09
1957-02-10
1957-02-11
1957-02-12
1957-02-13
1957-02-14
1957-02-15
1957-02-16
1957-02-17
1957-02-18
1957-02-19
1957-02-20
1957-02-21
1957-02-22
1957-02-23
1957-02-24
1957-02-25
1957-02-26
1957-02-27
1957-02-28
1957-03-01
1957-03-02
1957-03-03
1957-03-04
1957-03-05
1957-03-06
1957-03-07
1957-03-08
1957-03-09
1957-03-10
1957-03-11
1957-03-12
1957-03-13
1957-03-14
1957-03-15
1957-03-16
1957-03-17
1957-03-18
1957-03-19
1957-03-20
1957-03-21
1957-03-22
1957-03-23
1957-03-24
1957-03-25
1957-03-26
1957-03-27
1957-03-28
1957-03-29
1957-03-30
1957-03-31
1957-04-01
1957-04-02
1957-04-03
1957-04-04
1957-04-05
1957-04-06
1957-04-07
1957-04-08
1957-04-09
1957-04-10
1957-04-11
1957-04-12
1957-04-13
1957-04-14
1957-04-15
1957-04-16
1957-04-17
1957-04-18
1957-04-19
1957-04-20
1957-04-21
1957-04-22
1957-04-23
1957-04-24
1957-04-25
1957-04-26
1957-04-27
1957-04-28
1957-04-29
1957-04-30
1957-05-01
1957-05-02
1957-05-03
1957-05-04
1957-05-05
1957-05-06
1957-05-07
1957-05-08
1957-05-09
1957-05-10
1957-05-11
1957-05-12
1957-05-13
1957-05-14
1957-05-15
1957-05-16
1957-05-17
1957-05-18
1957-05-19
1957-05-20
1957-05-21
1957-05-22
1957-05-23
1957-05-24
1957-05-25
1957-05-26
1957-05-27
1957-05-28
1957-05-29
1957-05-30
1957-05-31
1957-06-01
1957-06-02
1957-06-03
1957-06-04
1957-06-05
1957-06-06
1957-06-07
1957-06-08
1957-06-09
1957-06-10
1957-06-11
1957-06-12
1957-06-13
1957-06-14
1957-06-15
1957-06-16
1957-06-17
1957-06-18
1957-06-19
1957-06-20
1957-06-21
1957-06-22
1957-06-23
1957-06-24
1957-06-25
1957-06-26
1957-06-27
1957-06-28
1957-06-29
1957-06-30
1957-07-01
1957-07-02
1957-07-03
1957-07-04
1957-07-05
1957-07-06
1957-07-07
1957-07-08
1957-07-09
1957-07-10
1957-07-11
1957-07-12
1957-07-13
1957-07-14
1957-07-15
1957-07-16
1957-07-17
1957-07-18
1957-07-19
1957-07-20
1957-07-21
1957-07-22
1957-07-23
1957-07-24
1957-07-25
1957-07-26
1957-07-27
1957-07-28
1957-07-29
1957-07-30
1957-07-31
1957-08-01
1957-08-02
1957-08-03
1957-08-04
1957-08-05
1957-08-06
1957-08-07
1957-08-08
1957-08-09
1957-08-10
1957-08-11
1957-08-12
1957-08-13
1957-08-14
1957-08-15
1957-08-16
1957-08-17
1957-08-18
1957-08-19
1957-08-20
1957-08-21
1957-08-22
1957-08-23
1957-08-24
1957-08-25
1957-08-26
1957-08-27
1957-08-28
1957-08-29
1957-08-30
1957-08-31
1957-09-01
1957-09-02
1957-09-03
1957-09-04
1957-09-05
1957-09-06
1957-09-07
1957-09-08
1957-09-09
1957-09-10
1957-09-11
1957-09-12
1957-09-13
1957-09-14
1957-09-15
1957-09-16
1957-09-17
1957-09-18
1957-09-19
1957-09-20
1957-09-21
1957-09-22
1957-09-23
1957-09-24
1957-09-25
1957-09-26
1957-09-27
1957-09-28
1957-09-29
1957-09-30
1957-10-01
1957-10-02
1957-10-03
1957-10-04
1957-10-05
1957-10-06
1957-10-07
1957-10-08
1957-10-09
1957-10-10
1957-10-11
1957-10-12
1957-10-13
1957-10-14
1957-10-15
1957-10-16
1957-10-17
1957-10-18
1957-10-19
1957-10-20
1957-10-21
1957-10-22
1957-10-23
1957-10-24
1957-10-25
1957-10-26
1957-10-27
1957-10-28
1957-10-29
1957-10-30
1957-10-31
1957-11-01
1957-11-02
1957-11-03
1957-11-04
1957-11-05
1957-11-06
1957-11-07
1957-11-08
1957-11-09
1957-11-10
1957-11-11
1957-11-12
1957-11-13
1957-11-14
1957-11-15
1957-11-16
1957-11-17
1957-11-18
1957-11-19
1957-11-20
1957-11-21
1957-11-22
1957-11-23
1957-11-24
1957-11-25
1957-11-26
1957-11-27
1957-11-28
1957-11-29
1957-11-30
1957-12-01
1957-12-02
1957-12-03
1957-12-04
1957-12-05
1957-12-06
1957-12-07
1957-12-08
1957-12-09
1957-12-10
1957-12-11
1957-12-12
1957-12-13
1957-12-14
1957-12-15
1957-12-16
1957-12-17
1957-12-18
1957-12-19
1957-12-20
1957-12-21
1957-12-22
1957-12-23
1957-12-24
1957-12-25
1957-12-26
1957-12-27
1957-12-28
1957-12-29
1957-12-30
1957-12-31
1958-01-01
1958-01-02
1958-01-03
1958-01-04
1958-01-05
1958-01-06
1958-01-07
1958-01-08
1958-01-09
1958-01-10
1958-01-11
1958-01-12
1958-01-13
1958-01-14
1958-01-15
1958-01-16
1958-01-17
1958-01-18
1958-01-19
1958-01-20
1958-01-21
1958-01-22
1958-01-23
1958-01-24
1958-01-25
1958-01-26
1958-01-27
1958-01-28
1958-01-29
1958-01-30
1958-01-31
1958-02-01
1958-02-02
1958-02-03
1958-02-04
1958-02-05
1958-02-06
1958-02-07
1958-02-08
1958-02-09
1958-02-10
1958-02-11
1958-02-12
1958-02-13
1958-02-14
1958-02-15
1958-02-16
1958-02-17
1958-02-18
1958-02-19
1958-02-20
1958-02-21
1958-02-22
1958-02-23
1958-02-24
1958-02-25
1958-02-26
1958-02-27
1958-02-28
1958-03-01
1958-03-02
1958-03-03
1958-03-04
1958-03-05
1958-03-06
1958-03-07
1958-03-08
1958-03-09
1958-03-10
1958-03-11
1958-03-12
1958-03-13
1958-03-14
1958-03-15
1958-03-16
1958-03-17
1958-03-18
1958-03-19
1958-03-20
1958-03-21
1958-03-22
1958-03-23
1958-03-24
1958-03-25
1958-03-26
1958-03-27
1958-03-28
1958-03-29
1958-03-30
1958-03-31
1958-04-01
1958-04-02
1958-04-03
1958-04-04
1958-04-05
1958-04-06
1958-04-07
1958-04-08
1958-04-09
1958-04-10
1958-04-11
1958-04-12
1958-04-13
1958-04-14
1958-04-15
1958-04-16
1958-04-17
1958-04-18
1958-04-19
1958-04-20
1958-04-21
1958-04-22
1958-04-23
1958-04-24
1958-04-25
1958-04-26
1958-04-27
1958-04-28
1958-04-29
1958-04-30
1958-05-01
1958-05-02
1958-05-03
1958-05-04
1958-05-05
1958-05-06
1958-05-07
1958-05-08
1958-05-09
1958-05-10
1958-05-11
1958-05-12
1958-05-13
1958-05-14
1958-05-15
1958-05-16
1958-05-17
1958-05-18
1958-05-19
1958-05-20
1958-05-21
1958-05-22
1958-05-23
1958-05-24
1958-05-25
1958-05-26
1958-05-27
1958-05-28
1958-05-29
1958-05-30
1958-05-31
1958-06-01
1958-06-02
1958-06-03
1958-06-04
1958-06-05
1958-06-06
1958-06-07
1958-06-08
1958-06-09
1958-06-10
1958-06-11
1958-06-12
1958-06-13
1958-06-14
1958-06-15
1958-06-16
1958-06-17
1958-06-18
1958-06-19
1958-06-20
1958-06-21
1958-06-22
1958-06-23
1958-06-24
1958-06-25
1958-06-26
1958-06-27
1958-06-28
1958-06-29
1958-06-30
1958-07-01
1958-07-02
1958-07-03
1958-07-04
1958-07-05
1958-07-06
1958-07-07
1958-07-08
1958-07-09
1958-07-10
1958-07-11
1958-07-12
1958-07-13
1958-07-14
1958-07-15
1958-07-16
1958-07-17
1958-07-18
1958-07-19
1958-07-20
1958-07-21
1958-07-22
1958-07-23
1958-07-24
1958-07-25
1958-07-26
1958-07-27
1958-07-28
1958-07-29
1958-07-30
1958-07-31
1958-08-01
1958-08-02
1958-08-03
1958-08-04
1958-08-05
1958-08-06
1958-08-07
1958-08-08
1958-08-09
1958-08-10
1958-08-11
1958-08-12
1958-08-13
1958-08-14
1958-08-15
1958-08-16
1958-08-17
1958-08-18
1958-08-19
1958-08-20
1958-08-21
1958-08-22
1958-08-23
1958-08-24
1958-08-25
1958-08-26
1958-08-27
1958-08-28
1958-08-29
1958-08-30
1958-08-31
1958-09-01
1958-09-02
1958-09-03
1958-09-04
1958-09-05
1958-09-06
1958-09-07
1958-09-08
1958-09-09
1958-09-10
1958-09-11
1958-09-12
1958-09-13
1958-09-14
1958-09-15
1958-09-16
1958-09-17
1958-09-18
1958-09-19
1958-09-20
1958-09-21
1958-09-22
1958-09-23
1958-09-24
1958-09-25
1958-09-26
1958-09-27
1958-09-28
1958-09-29
1958-09-30
1958-10-01
1958-10-02
1958-10-03
1958-10-04
1958-10-05
1958-10-06
1958-10-07
1958-10-08
1958-10-09
1958-10-10
1958-10-11
1958-10-12
1958-10-13
1958-10-14
1958-10-15
1958-10-16
1958-10-17
1958-10-18
1958-10-19
1958-10-20
1958-10-21
1958-10-22
1958-10-23
1958-10-24
1958-10-25
1958-10-26
1958-10-27
1958-10-28
1958-10-29
1958-10-30
1958-10-31
1958-11-01
1958-11-02
1958-11-03
1958-11-04
1958-11-05
1958-11-06
1958-11-07
1958-11-08
1958-11-09
1958-11-10
1958-11-11
1958-11-12
1958-11-13
1958-11-14
1958-11-15
1958-11-16
1958-11-17
1958-11-18
1958-11-19
1958-11-20
1958-11-21
1958-11-22
1958-11-23
1958-11-24
1958-11-25
1958-11-26
1958-11-27
1958-11-28
1958-11-29
1958-11-30
1958-12-01
1958-12-02
1958-12-03
1958-12-04
1958-12-05
1958-12-06
1958-12-07
1958-12-08
1958-12-09
1958-12-10
1958-12-11
1958-12-12
1958-12-13
1958-12-14
1958-12-15
1958-12-16
1958-12-17
1958-12-18
1958-12-19
1958-12-20
1958-12-21
1958-12-22
1958-12-23
1958-12-24
1958-12-25
1958-12-26
1958-12-27
1958-12-28
1958-12-29
1958-12-30
1958-12-31
1959-01-01
1959-01-02
1959-01-03
1959-01-04
1959-01-05
1959-01-06
1959-01-07
1959-01-08
1959-01-09
1959-01-10
1959-01-11
1959-01-12
1959-01-13
1959-01-14
1959-01-15
1959-01-16
1959-01-17
1959-01-18
1959-01-19
1959-01-20
1959-01-21
1959-01-22
1959-01-23
1959-01-24
1959-01-25
1959-01-26
1959-01-27
1959-01-28
1959-01-29
1959-01-30
1959-01-31
1959-02-01
1959-02-02
1959-02-03
1959-02-04
1959-02-05
1959-02-06
1959-02-07
1959-02-08
1959-02-09
1959-02-10
1959-02-11
1959-02-12
1959-02-13
1959-02-14
1959-02-15
1959-02-16
1959-02-17
1959-02-18
1959-02-19
1959-02-20
1959-02-21
1959-02-22
1959-02-23
1959-02-24
1959-02-25
1959-02-26
1959-02-27
1959-02-28
1959-03-01
1959-03-02
1959-03-03
1959-03-04
1959-03-05
1959-03-06
1959-03-07
1959-03-08
1959-03-09
1959-03-10
1959-03-11
1959-03-12
1959-03-13
1959-03-14
1959-03-15
1959-03-16
1959-03-17
1959-03-18
1959-03-19
1959-03-20
1959-03-21
1959-03-22
1959-03-23
1959-03-24
1959-03-25
1959-03-26
1959-03-27
1959-03-28
1959-03-29
1959-03-30
1959-03-31
1959-04-01
1959-04-02
1959-04-03
1959-04-04
1959-04-05
1959-04-06
1959-04-07
1959-04-08
1959-04-09
1959-04-10
1959-04-11
1959-04-12
1959-04-13
1959-04-14
1959-04-15
1959-04-16
1959-04-17
1959-04-18
1959-04-19
1959-04-20
1959-04-21
1959-04-22
1959-04-23
1959-04-24
1959-04-25
1959-04-26
1959-04-27
1959-04-28
1959-04-29
1959-04-30
1959-05-01
1959-05-02
1959-05-03
1959-05-04
1959-05-05
1959-05-06
1959-05-07
1959-05-08
1959-05-09
1959-05-10
1959-05-11
1959-05-12
1959-05-13
1959-05-14
1959-05-15
1959-05-16
1959-05-17
1959-05-18
1959-05-19
1959-05-20
1959-05-21
1959-05-22
1959-05-23
1959-05-24
1959-05-25
1959-05-26
1959-05-27
1959-05-28
1959-05-29
1959-05-30
1959-05-31
1959-06-01
1959-06-02
1959-06-03
1959-06-04
1959-06-05
1959-06-06
1959-06-07
1959-06-08
1959-06-09
1959-06-10
1959-06-11
1959-06-12
1959-06-13
1959-06-14
1959-06-15
1959-06-16
1959-06-17
1959-06-18
1959-06-19
1959-06-20
1959-06-21
1959-06-22
1959-06-23
1959-06-24
1959-06-25
1959-06-26
1959-06-27
1959-06-28
1959-06-29
1959-06-30
1959-07-01
1959-07-02
1959-07-03
1959-07-04
1959-07-05
1959-07-06
1959-07-07
1959-07-08
1959-07-09
1959-07-10
1959-07-11
1959-07-12
1959-07-13
1959-07-14
1959-07-15
1959-07-16
1959-07-17
1959-07-18
1959-07-19
1959-07-20
1959-07-21
1959-07-22
1959-07-23
1959-07-24
1959-07-25
1959-07-26
1959-07-27
1959-07-28
1959-07-29
1959-07-30
1959-07-31
1959-08-01
1959-08-02
1959-08-03
1959-08-04
1959-08-05
1959-08-06
1959-08-07
1959-08-08
1959-08-09
1959-08-10
1959-08-11
1959-08-12
1959-08-13
1959-08-14
1959-08-15
1959-08-16
1959-08-17
1959-08-18
1959-08-19
1959-08-20
1959-08-21
1959-08-22
1959-08-23
1959-08-24
1959-08-25
1959-08-26
1959-08-27
1959-08-28
1959-08-29
1959-08-30
1959-08-31
1959-09-01
1959-09-02
1959-09-03
1959-09-04
1959-09-05
1959-09-06
1959-09-07
1959-09-08
1959-09-09
1959-09-10
1959-09-11
1959-09-12
1959-09-13
1959-09-14
1959-09-15
1959-09-16
1959-09-17
1959-09-18
1959-09-19
1959-09-20
1959-09-21
1959-09-22
1959-09-23
1959-09-24
1959-09-25
1959-09-26
1959-09-27
1959-09-28
1959-09-29
1959-09-30
1959-10-01
1959-10-02
1959-10-03
1959-10-04
1959-10-05
1959-10-06
1959-10-07
1959-10-08
1959-10-09
1959-10-10
1959-10-11
1959-10-12
1959-10-13
1959-10-14
1959-10-15
1959-10-16
1959-10-17
1959-10-18
1959-10-19
1959-10-20
1959-10-21
1959-10-22
1959-10-23
1959-10-24
1959-10-25
1959-10-26
1959-10-27
1959-10-28
1959-10-29
1959-10-30
1959-10-31
1959-11-01
1959-11-02
1959-11-03
1959-11-04
1959-11-05
1959-11-06
1959-11-07
1959-11-08
1959-11-09
1959-11-10
1959-11-11
1959-11-12
1959-11-13
1959-11-14
1959-11-15
1959-11-16
1959-11-17
1959-11-18
1959-11-19
1959-11-20
1959-11-21
1959-11-22
1959-11-23
1959-11-24
1959-11-25
1959-11-26
1959-11-27
1959-11-28
1959-11-29
1959-11-30
1959-12-01
1959-12-02
1959-12-03
1959-12-04
1959-12-05
1959-12-06
1959-12-07
1959-12-08
1959-12-09
1959-12-10
1959-12-11
1959-12-12
1959-12-13
1959-12-14
1959-12-15
1959-12-16
1959-12-17
1959-12-18
1959-12-19
1959-12-20
1959-12-21
1959-12-22
1959-12-23
1959-12-24
1959-12-25
1959-12-26
1959-12-27
1959-12-28
1959-12-29
1959-12-30
1959-12-31
1960-01-01
1960-01-02
1960-01-03
1960-01-04
1960-01-05
1960-01-06
1960-01-07
1960-01-08
1960-01-09
1960-01-10
1960-01-11
1960-01-12
1960-01-13
1960-01-14
1960-01-15
1960-01-16
1960-01-17
1960-01-18
1960-01-19
1960-01-20
1960-01-21
1960-01-22
1960-01-23
1960-01-24
1960-01-25
1960-01-26
1960-01-27
1960-01-28
1960-01-29
1960-01-30
1960-01-31
1960-02-01
1960-02-02
1960-02-03
1960-02-04
1960-02-05
1960-02-06
1960-02-07
1960-02-08
1960-02-09
1960-02-10
1960-02-11
1960-02-12
1960-02-13
1960-02-14
1960-02-15
1960-02-16
1960-02-17
1960-02-18
1960-02-19
1960-02-20
1960-02-21
1960-02-22
1960-02-23
1960-02-24
1960-02-25
1960-02-26
1960-02-27
1960-02-28
1960-02-29
1960-03-01
1960-03-02
1960-03-03
1960-03-04
1960-03-05
1960-03-06
1960-03-07
1960-03-08
1960-03-09
1960-03-10
1960-03-11
1960-03-12
1960-03-13
1960-03-14
1960-03-15
1960-03-16
1960-03-17
1960-03-18
1960-03-19
1960-03-20
1960-03-21
1960-03-22
1960-03-23
1960-03-24
1960-03-25
1960-03-26
1960-03-27
1960-03-28
1960-03-29
1960-03-30
1960-03-31
1960-04-01
1960-04-02
1960-04-03
1960-04-04
1960-04-05
1960-04-06
1960-04-07
1960-04-08
1960-04-09
1960-04-10
1960-04-11
1960-04-12
1960-04-13
1960-04-14
1960-04-15
1960-04-16
1960-04-17
1960-04-18
1960-04-19
1960-04-20
1960-04-21
1960-04-22
1960-04-23
1960-04-24
1960-04-25
1960-04-26
1960-04-27
1960-04-28
1960-04-29
1960-04-30
1960-05-01
1960-05-02
1960-05-03
1960-05-04
1960-05-05
1960-05-06
1960-05-07
1960-05-08
1960-05-09
1960-05-10
1960-05-11
1960-05-12
1960-05-13
1960-05-14
1960-05-15
1960-05-16
1960-05-17
1960-05-18
1960-05-19
1960-05-20
1960-05-21
1960-05-22
1960-05-23
1960-05-24
1960-05-25
1960-05-26
1960-05-27
1960-05-28
1960-05-29
1960-05-30
1960-05-31
1960-06-01
1960-06-02
1960-06-03
1960-06-04
1960-06-05
1960-06-06
1960-06-07
1960-06-08
1960-06-09
1960-06-10
1960-06-11
1960-06-12
1960-06-13
1960-06-14
1960-06-15
1960-06-16
1960-06-17
1960-06-18
1960-06-19
1960-06-20
1960-06-21
1960-06-22
1960-06-23
1960-06-24
1960-06-25
1960-06-26
1960-06-27
1960-06-28
1960-06-29
1960-06-30
1960-07-01
1960-07-02
1960-07-03
1960-07-04
1960-07-05
1960-07-06
1960-07-07
1960-07-08
1960-07-09
1960-07-10
1960-07-11
1960-07-12
1960-07-13
1960-07-14
1960-07-15
1960-07-16
1960-07-17
1960-07-18
1960-07-19
1960-07-20
1960-07-21
1960-07-22
1960-07-23
1960-07-24
1960-07-25
1960-07-26
1960-07-27
1960-07-28
1960-07-29
1960-07-30
1960-07-31
1960-08-01
1960-08-02
1960-08-03
1960-08-04
1960-08-05
1960-08-06
1960-08-07
1960-08-08
1960-08-09
1960-08-10
1960-08-11
1960-08-12
1960-08-13
1960-08-14
1960-08-15
1960-08-16
1960-08-17
1960-08-18
1960-08-19
1960-08-20
1960-08-21
1960-08-22
1960-08-23
1960-08-24
1960-08-25
1960-08-26
1960-08-27
1960-08-28
1960-08-29
1960-08-30
1960-08-31
1960-09-01
1960-09-02
1960-09-03
1960-09-04
1960-09-05
1960-09-06
1960-09-07
1960-09-08
1960-09-09
1960-09-10
1960-09-11
1960-09-12
1960-09-13
1960-09-14
1960-09-15
1960-09-16
1960-09-17
1960-09-18
1960-09-19
1960-09-20
1960-09-21
1960-09-22
1960-09-23
1960-09-24
1960-09-25
1960-09-26
1960-09-27
1960-09-28
1960-09-29
1960-09-30
1960-10-01
1960-10-02
1960-10-03
1960-10-04
1960-10-05
1960-10-06
1960-10-07
1960-10-08
1960-10-09
1960-10-10
1960-10-11
1960-10-12
1960-10-13
1960-10-14
1960-10-15
1960-10-16
1960-10-17
1960-10-18
1960-10-19
1960-10-20
1960-10-21
1960-10-22
1960-10-23
1960-10-24
1960-10-25
1960-10-26
1960-10-27
1960-10-28
1960-10-29
1960-10-30
1960-10-31
1960-11-01
1960-11-02
1960-11-03
1960-11-04
1960-11-05
1960-11-06
1960-11-07
1960-11-08
1960-11-09
1960-11-10
1960-11-11
1960-11-12
1960-11-13
1960-11-14
1960-11-15
1960-11-16
1960-11-17
1960-11-18
1960-11-19
1960-11-20
1960-11-21
1960-11-22
1960-11-23
1960-11-24
1960-11-25
1960-11-26
1960-11-27
1960-11-28
1960-11-29
1960-11-30
1960-12-01
1960-12-02
1960-12-03
1960-12-04
1960-12-05
1960-12-06
1960-12-07
1960-12-08
1960-12-09
1960-12-10
1960-12-11
1960-12-12
1960-12-13
1960-12-14
1960-12-15
1960-12-16
1960-12-17
1960-12-18
1960-12-19
1960-12-20
1960-12-21
1960-12-22
1960-12-23
1960-12-24
1960-12-25
1960-12-26
1960-12-27
1960-12-28
1960-12-29
1960-12-30
1960-12-31
1961-01-01
1961-01-02
1961-01-03
1961-01-04
1961-01-05
1961-01-06
1961-01-07
1961-01-08
1961-01-09
1961-01-10
1961-01-11
1961-01-12
1961-01-13
1961-01-14
1961-01-15
1961-01-16
1961-01-17
1961-01-18
1961-01-19
1961-01-20
1961-01-21
1961-01-22
1961-01-23
1961-01-24
1961-01-25
1961-01-26
1961-01-27
1961-01-28
1961-01-29
1961-01-30
1961-01-31
1961-02-01
1961-02-02
1961-02-03
1961-02-04
1961-02-05
1961-02-06
1961-02-07
1961-02-08
1961-02-09
1961-02-10
1961-02-11
1961-02-12
1961-02-13
1961-02-14
1961-02-15
1961-02-16
1961-02-17
1961-02-18
1961-02-19
1961-02-20
1961-02-21
1961-02-22
1961-02-23
1961-02-24
1961-02-25
1961-02-26
1961-02-27
1961-02-28
1961-03-01
1961-03-02
1961-03-03
1961-03-04
1961-03-05
1961-03-06
1961-03-07
1961-03-08
1961-03-09
1961-03-10
1961-03-11
[truncated: 19,896 more rows]

## Sheet: Water level
Water level [m]	Nyangores 1LA03	Amala 1LB02	Mines 5H2
1955-09-21	To receive the data in order to verify the analysis and model results of this paper, please feel free contact us (T.A.Bogaard@tudelft.nl).
1955-09-22
1955-09-23
1955-09-24
1955-09-25
1955-09-26
1955-09-27
1955-09-28
1955-09-29
1955-09-30
1955-10-01
1955-10-02
1955-10-03
1955-10-04
1955-10-05
1955-10-06
1955-10-07
1955-10-08
1955-10-09
1955-10-10
1955-10-11
1955-10-12
1955-10-13
1955-10-14
1955-10-15
1955-10-16
1955-10-17
1955-10-18
1955-10-19
1955-10-20
1955-10-21
1955-10-22
1955-10-23
1955-10-24
1955-10-25
1955-10-26
1955-10-27
1955-10-28
1955-10-29
1955-10-30
1955-10-31
1955-11-01
1955-11-02
1955-11-03
1955-11-04
1955-11-05
1955-11-06
1955-11-07
1955-11-08
1955-11-09
1955-11-10
1955-11-11
1955-11-12
1955-11-13
1955-11-14
1955-11-15
1955-11-16
1955-11-17
1955-11-18
1955-11-19
1955-11-20
1955-11-21
1955-11-22
1955-11-23
1955-11-24
1955-11-25
1955-11-26
1955-11-27
1955-11-28
1955-11-29
1955-11-30
1955-12-01
1955-12-02
1955-12-03
1955-12-04
1955-12-05
1955-12-06
1955-12-07
1955-12-08
1955-12-09
1955-12-10
1955-12-11
1955-12-12
1955-12-13
1955-12-14
1955-12-15
1955-12-16
1955-12-17
1955-12-18
1955-12-19
1955-12-20
1955-12-21
1955-12-22
1955-12-23
1955-12-24
1955-12-25
1955-12-26
1955-12-27
1955-12-28
1955-12-29
1955-12-30
1955-12-31
1956-01-01
1956-01-02
1956-01-03
1956-01-04
1956-01-05
1956-01-06
1956-01-07
1956-01-08
1956-01-09
1956-01-10
1956-01-11
1956-01-12
1956-01-13
1956-01-14
1956-01-15
1956-01-16
1956-01-17
1956-01-18
1956-01-19
1956-01-20
1956-01-21
1956-01-22
1956-01-23
1956-01-24
1956-01-25
1956-01-26
1956-01-27
1956-01-28
1956-01-29
1956-01-30
1956-01-31
1956-02-01
1956-02-02
1956-02-03
1956-02-04
1956-02-05
1956-02-06
1956-02-07
1956-02-08
1956-02-09
1956-02-10
1956-02-11
1956-02-12
1956-02-13
1956-02-14
1956-02-15
1956-02-16
1956-02-17
1956-02-18
1956-02-19
1956-02-20
1956-02-21
1956-02-22
1956-02-23
1956-02-24
1956-02-25
1956-02-26
1956-02-27
1956-02-28
1956-02-29
1956-03-01
1956-03-02
1956-03-03
1956-03-04
1956-03-05
1956-03-06
1956-03-07
1956-03-08
1956-03-09
1956-03-10
1956-03-11
1956-03-12
1956-03-13
1956-03-14
1956-03-15
1956-03-16
1956-03-17
1956-03-18
1956-03-19
1956-03-20
1956-03-21
1956-03-22
1956-03-23
1956-03-24
1956-03-25
1956-03-26
1956-03-27
1956-03-28
1956-03-29
1956-03-30
1956-03-31
1956-04-01
1956-04-02
1956-04-03
1956-04-04
1956-04-05
1956-04-06
1956-04-07
1956-04-08
1956-04-09
1956-04-10
1956-04-11
1956-04-12
1956-04-13
1956-04-14
1956-04-15
1956-04-16
1956-04-17
1956-04-18
1956-04-19
1956-04-20
1956-04-21
1956-04-22
1956-04-23
1956-04-24
1956-04-25
1956-04-26
1956-04-27
1956-04-28
1956-04-29
1956-04-30
1956-05-01
1956-05-02
1956-05-03
1956-05-04
1956-05-05
1956-05-06
1956-05-07
1956-05-08
1956-05-09
1956-05-10
1956-05-11
1956-05-12
1956-05-13
1956-05-14
1956-05-15
1956-05-16
1956-05-17
1956-05-18
1956-05-19
1956-05-20
1956-05-21
1956-05-22
1956-05-23
1956-05-24
1956-05-25
1956-05-26
1956-05-27
1956-05-28
1956-05-29
1956-05-30
1956-05-31
1956-06-01
1956-06-02
1956-06-03
1956-06-04
1956-06-05
1956-06-06
1956-06-07
1956-06-08
1956-06-09
1956-06-10
1956-06-11
1956-06-12
1956-06-13
1956-06-14
1956-06-15
1956-06-16
1956-06-17
1956-06-18
1956-06-19
1956-06-20
1956-06-21
1956-06-22
1956-06-23
1956-06-24
1956-06-25
1956-06-26
1956-06-27
1956-06-28
1956-06-29
1956-06-30
1956-07-01
1956-07-02
1956-07-03
1956-07-04
1956-07-05
1956-07-06
1956-07-07
1956-07-08
1956-07-09
1956-07-10
1956-07-11
1956-07-12
1956-07-13
1956-07-14
1956-07-15
1956-07-16
1956-07-17
1956-07-18
1956-07-19
1956-07-20
1956-07-21
1956-07-22
1956-07-23
1956-07-24
1956-07-25
1956-07-26
1956-07-27
1956-07-28
1956-07-29
1956-07-30
1956-07-31
1956-08-01
1956-08-02
1956-08-03
1956-08-04
1956-08-05
1956-08-06
1956-08-07
1956-08-08
1956-08-09
1956-08-10
1956-08-11
1956-08-12
1956-08-13
1956-08-14
1956-08-15
1956-08-16
1956-08-17
1956-08-18
1956-08-19
1956-08-20
1956-08-21
1956-08-22
1956-08-23
1956-08-24
1956-08-25
1956-08-26
1956-08-27
1956-08-28
1956-08-29
1956-08-30
1956-08-31
1956-09-01
1956-09-02
1956-09-03
1956-09-04
1956-09-05
1956-09-06
1956-09-07
1956-09-08
1956-09-09
1956-09-10
1956-09-11
1956-09-12
1956-09-13
1956-09-14
1956-09-15
1956-09-16
1956-09-17
1956-09-18
1956-09-19
1956-09-20
1956-09-21
1956-09-22
1956-09-23
1956-09-24
1956-09-25
1956-09-26
1956-09-27
1956-09-28
1956-09-29
1956-09-30
1956-10-01
1956-10-02
1956-10-03
1956-10-04
1956-10-05
1956-10-06
1956-10-07
1956-10-08
1956-10-09
1956-10-10
1956-10-11
1956-10-12
1956-10-13
1956-10-14
1956-10-15
1956-10-16
1956-10-17
1956-10-18
1956-10-19
1956-10-20
1956-10-21
1956-10-22
1956-10-23
1956-10-24
1956-10-25
1956-10-26
1956-10-27
1956-10-28
1956-10-29
1956-10-30
1956-10-31
1956-11-01
1956-11-02
1956-11-03
1956-11-04
1956-11-05
1956-11-06
1956-11-07
1956-11-08
1956-11-09
1956-11-10
1956-11-11
1956-11-12
1956-11-13
1956-11-14
1956-11-15
1956-11-16
1956-11-17
1956-11-18
1956-11-19
1956-11-20
1956-11-21
1956-11-22
1956-11-23
1956-11-24
1956-11-25
1956-11-26
1956-11-27
1956-11-28
1956-11-29
1956-11-30
1956-12-01
1956-12-02
1956-12-03
1956-12-04
1956-12-05
1956-12-06
1956-12-07
1956-12-08
1956-12-09
1956-12-10
1956-12-11
1956-12-12
1956-12-13
1956-12-14
1956-12-15
1956-12-16
1956-12-17
1956-12-18
1956-12-19
1956-12-20
1956-12-21
1956-12-22
1956-12-23
1956-12-24
1956-12-25
1956-12-26
1956-12-27
1956-12-28
1956-12-29
1956-12-30
1956-12-31
1957-01-01
1957-01-02
1957-01-03
1957-01-04
1957-01-05
1957-01-06
1957-01-07
1957-01-08
1957-01-09
1957-01-10
1957-01-11
1957-01-12
1957-01-13
1957-01-14
1957-01-15
1957-01-16
1957-01-17
1957-01-18
1957-01-19
1957-01-20
1957-01-21
1957-01-22
1957-01-23
1957-01-24
1957-01-25
1957-01-26
1957-01-27
1957-01-28
1957-01-29
1957-01-30
1957-01-31
1957-02-01
1957-02-02
1957-02-03
1957-02-04
1957-02-05
1957-02-06
1957-02-07
1957-02-08
1957-02-09
1957-02-10
1957-02-11
1957-02-12
1957-02-13
1957-02-14
1957-02-15
1957-02-16
1957-02-17
1957-02-18
1957-02-19
1957-02-20
1957-02-21
1957-02-22
1957-02-23
1957-02-24
1957-02-25
1957-02-26
1957-02-27
1957-02-28
1957-03-01
1957-03-02
1957-03-03
1957-03-04
1957-03-05
1957-03-06
1957-03-07
1957-03-08
1957-03-09
1957-03-10
1957-03-11
1957-03-12
1957-03-13
1957-03-14
1957-03-15
1957-03-16
1957-03-17
1957-03-18
1957-03-19
1957-03-20
1957-03-21
1957-03-22
1957-03-23
1957-03-24
1957-03-25
1957-03-26
1957-03-27
1957-03-28
1957-03-29
1957-03-30
1957-03-31
1957-04-01
1957-04-02
1957-04-03
1957-04-04
1957-04-05
1957-04-06
1957-04-07
1957-04-08
1957-04-09
1957-04-10
1957-04-11
1957-04-12
1957-04-13
1957-04-14
1957-04-15
1957-04-16
1957-04-17
1957-04-18
1957-04-19
1957-04-20
1957-04-21
1957-04-22
1957-04-23
1957-04-24
1957-04-25
1957-04-26
1957-04-27
1957-04-28
1957-04-29
1957-04-30
1957-05-01
1957-05-02
1957-05-03
1957-05-04
1957-05-05
1957-05-06
1957-05-07
1957-05-08
1957-05-09
1957-05-10
1957-05-11
1957-05-12
1957-05-13
1957-05-14
1957-05-15
1957-05-16
1957-05-17
1957-05-18
1957-05-19
1957-05-20
1957-05-21
1957-05-22
1957-05-23
1957-05-24
1957-05-25
1957-05-26
1957-05-27
1957-05-28
1957-05-29
1957-05-30
1957-05-31
1957-06-01
1957-06-02
1957-06-03
1957-06-04
1957-06-05
1957-06-06
1957-06-07
1957-06-08
1957-06-09
1957-06-10
1957-06-11
1957-06-12
1957-06-13
1957-06-14
1957-06-15
1957-06-16
1957-06-17
1957-06-18
1957-06-19
1957-06-20
1957-06-21
1957-06-22
1957-06-23
1957-06-24
1957-06-25
1957-06-26
1957-06-27
1957-06-28
1957-06-29
1957-06-30
1957-07-01
1957-07-02
1957-07-03
1957-07-04
1957-07-05
1957-07-06
1957-07-07
1957-07-08
1957-07-09
1957-07-10
1957-07-11
1957-07-12
1957-07-13
1957-07-14
1957-07-15
1957-07-16
1957-07-17
1957-07-18
1957-07-19
1957-07-20
1957-07-21
1957-07-22
1957-07-23
1957-07-24
1957-07-25
1957-07-26
1957-07-27
1957-07-28
1957-07-29
1957-07-30
1957-07-31
1957-08-01
1957-08-02
1957-08-03
1957-08-04
1957-08-05
1957-08-06
1957-08-07
1957-08-08
1957-08-09
1957-08-10
1957-08-11
1957-08-12
1957-08-13
1957-08-14
1957-08-15
1957-08-16
1957-08-17
1957-08-18
1957-08-19
1957-08-20
1957-08-21
1957-08-22
1957-08-23
1957-08-24
1957-08-25
1957-08-26
1957-08-27
1957-08-28
1957-08-29
1957-08-30
1957-08-31
1957-09-01
1957-09-02
1957-09-03
1957-09-04
1957-09-05
1957-09-06
1957-09-07
1957-09-08
1957-09-09
1957-09-10
1957-09-11
1957-09-12
1957-09-13
1957-09-14
1957-09-15
1957-09-16
1957-09-17
1957-09-18
1957-09-19
1957-09-20
1957-09-21
1957-09-22
1957-09-23
1957-09-24
1957-09-25
1957-09-26
1957-09-27
1957-09-28
1957-09-29
1957-09-30
1957-10-01
1957-10-02
1957-10-03
1957-10-04
1957-10-05
1957-10-06
1957-10-07
1957-10-08
1957-10-09
1957-10-10
1957-10-11
1957-10-12
1957-10-13
1957-10-14
1957-10-15
1957-10-16
1957-10-17
1957-10-18
1957-10-19
1957-10-20
1957-10-21
1957-10-22
1957-10-23
1957-10-24
1957-10-25
1957-10-26
1957-10-27
1957-10-28
1957-10-29
1957-10-30
1957-10-31
1957-11-01
1957-11-02
1957-11-03
1957-11-04
1957-11-05
1957-11-06
1957-11-07
1957-11-08
1957-11-09
1957-11-10
1957-11-11
1957-11-12
1957-11-13
1957-11-14
1957-11-15
1957-11-16
1957-11-17
1957-11-18
1957-11-19
1957-11-20
1957-11-21
1957-11-22
1957-11-23
1957-11-24
1957-11-25
1957-11-26
1957-11-27
1957-11-28
1957-11-29
1957-11-30
1957-12-01
1957-12-02
1957-12-03
1957-12-04
1957-12-05
1957-12-06
1957-12-07
1957-12-08
1957-12-09
1957-12-10
1957-12-11
1957-12-12
1957-12-13
1957-12-14
1957-12-15
1957-12-16
1957-12-17
1957-12-18
1957-12-19
1957-12-20
1957-12-21
1957-12-22
1957-12-23
1957-12-24
1957-12-25
1957-12-26
1957-12-27
1957-12-28
1957-12-29
1957-12-30
1957-12-31
1958-01-01
1958-01-02
1958-01-03
1958-01-04
1958-01-05
1958-01-06
1958-01-07
1958-01-08
1958-01-09
1958-01-10
1958-01-11
1958-01-12
1958-01-13
1958-01-14
1958-01-15
1958-01-16
1958-01-17
1958-01-18
1958-01-19
1958-01-20
1958-01-21
1958-01-22
1958-01-23
1958-01-24
1958-01-25
1958-01-26
1958-01-27
1958-01-28
1958-01-29
1958-01-30
1958-01-31
1958-02-01
1958-02-02
1958-02-03
1958-02-04
1958-02-05
1958-02-06
1958-02-07
1958-02-08
1958-02-09
1958-02-10
1958-02-11
1958-02-12
1958-02-13
1958-02-14
1958-02-15
1958-02-16
1958-02-17
1958-02-18
1958-02-19
1958-02-20
1958-02-21
1958-02-22
1958-02-23
1958-02-24
1958-02-25
1958-02-26
1958-02-27
1958-02-28
1958-03-01
1958-03-02
1958-03-03
1958-03-04
1958-03-05
1958-03-06
1958-03-07
1958-03-08
1958-03-09
1958-03-10
1958-03-11
1958-03-12
1958-03-13
1958-03-14
1958-03-15
1958-03-16
1958-03-17
1958-03-18
1958-03-19
1958-03-20
1958-03-21
1958-03-22
1958-03-23
1958-03-24
1958-03-25
1958-03-26
1958-03-27
1958-03-28
1958-03-29
1958-03-30
1958-03-31
1958-04-01
1958-04-02
1958-04-03
1958-04-04
1958-04-05
1958-04-06
1958-04-07
1958-04-08
1958-04-09
1958-04-10
1958-04-11
1958-04-12
1958-04-13
1958-04-14
1958-04-15
1958-04-16
1958-04-17
1958-04-18
1958-04-19
1958-04-20
1958-04-21
1958-04-22
1958-04-23
1958-04-24
1958-04-25
1958-04-26
1958-04-27
1958-04-28
1958-04-29
1958-04-30
1958-05-01
1958-05-02
1958-05-03
1958-05-04
1958-05-05
1958-05-06
1958-05-07
1958-05-08
1958-05-09
1958-05-10
1958-05-11
1958-05-12
1958-05-13
1958-05-14
1958-05-15
1958-05-16
1958-05-17
1958-05-18
1958-05-19
1958-05-20
1958-05-21
1958-05-22
1958-05-23
1958-05-24
1958-05-25
1958-05-26
1958-05-27
1958-05-28
1958-05-29
1958-05-30
1958-05-31
1958-06-01
1958-06-02
1958-06-03
1958-06-04
1958-06-05
1958-06-06
1958-06-07
1958-06-08
1958-06-09
1958-06-10
1958-06-11
1958-06-12
1958-06-13
1958-06-14
1958-06-15
1958-06-16
1958-06-17
1958-06-18
1958-06-19
1958-06-20
1958-06-21
1958-06-22
1958-06-23
1958-06-24
1958-06-25
1958-06-26
1958-06-27
1958-06-28
1958-06-29
1958-06-30
1958-07-01
1958-07-02
1958-07-03
1958-07-04
1958-07-05
1958-07-06
1958-07-07
1958-07-08
1958-07-09
1958-07-10
1958-07-11
1958-07-12
1958-07-13
1958-07-14
1958-07-15
1958-07-16
1958-07-17
1958-07-18
1958-07-19
1958-07-20
1958-07-21
1958-07-22
1958-07-23
1958-07-24
1958-07-25
1958-07-26
1958-07-27
1958-07-28
1958-07-29
1958-07-30
1958-07-31
1958-08-01
1958-08-02
1958-08-03
1958-08-04
1958-08-05
1958-08-06
1958-08-07
1958-08-08
1958-08-09
1958-08-10
1958-08-11
1958-08-12
1958-08-13
1958-08-14
1958-08-15
1958-08-16
1958-08-17
1958-08-18
1958-08-19
1958-08-20
1958-08-21
1958-08-22
1958-08-23
1958-08-24
1958-08-25
1958-08-26
1958-08-27
1958-08-28
1958-08-29
1958-08-30
1958-08-31
1958-09-01
1958-09-02
1958-09-03
1958-09-04
1958-09-05
1958-09-06
1958-09-07
1958-09-08
1958-09-09
1958-09-10
1958-09-11
1958-09-12
1958-09-13
1958-09-14
1958-09-15
1958-09-16
1958-09-17
1958-09-18
1958-09-19
1958-09-20
1958-09-21
1958-09-22
1958-09-23
1958-09-24
1958-09-25
1958-09-26
1958-09-27
1958-09-28
1958-09-29
1958-09-30
1958-10-01
1958-10-02
1958-10-03
1958-10-04
1958-10-05
1958-10-06
1958-10-07
1958-10-08
1958-10-09
1958-10-10
1958-10-11
1958-10-12
1958-10-13
1958-10-14
1958-10-15
1958-10-16
1958-10-17
1958-10-18
1958-10-19
1958-10-20
1958-10-21
1958-10-22
1958-10-23
1958-10-24
1958-10-25
1958-10-26
1958-10-27
1958-10-28
1958-10-29
1958-10-30
1958-10-31
1958-11-01
1958-11-02
1958-11-03
1958-11-04
1958-11-05
1958-11-06
1958-11-07
1958-11-08
1958-11-09
1958-11-10
1958-11-11
1958-11-12
1958-11-13
1958-11-14
1958-11-15
1958-11-16
1958-11-17
1958-11-18
1958-11-19
1958-11-20
1958-11-21
1958-11-22
1958-11-23
1958-11-24
1958-11-25
1958-11-26
1958-11-27
1958-11-28
1958-11-29
1958-11-30
1958-12-01
1958-12-02
1958-12-03
1958-12-04
1958-12-05
1958-12-06
1958-12-07
1958-12-08
1958-12-09
1958-12-10
1958-12-11
1958-12-12
1958-12-13
1958-12-14
1958-12-15
1958-12-16
1958-12-17
1958-12-18
1958-12-19
1958-12-20
1958-12-21
1958-12-22
1958-12-23
1958-12-24
1958-12-25
1958-12-26
1958-12-27
1958-12-28
1958-12-29
1958-12-30
1958-12-31
1959-01-01
1959-01-02
1959-01-03
1959-01-04
1959-01-05
1959-01-06
1959-01-07
1959-01-08
1959-01-09
1959-01-10
1959-01-11
1959-01-12
1959-01-13
1959-01-14
1959-01-15
1959-01-16
1959-01-17
1959-01-18
1959-01-19
1959-01-20
1959-01-21
1959-01-22
1959-01-23
1959-01-24
1959-01-25
1959-01-26
1959-01-27
1959-01-28
1959-01-29
1959-01-30
1959-01-31
1959-02-01
1959-02-02
1959-02-03
1959-02-04
1959-02-05
1959-02-06
1959-02-07
1959-02-08
1959-02-09
1959-02-10
1959-02-11
1959-02-12
1959-02-13
1959-02-14
1959-02-15
1959-02-16
1959-02-17
1959-02-18
1959-02-19
1959-02-20
1959-02-21
1959-02-22
1959-02-23
1959-02-24
1959-02-25
1959-02-26
1959-02-27
1959-02-28
1959-03-01
1959-03-02
1959-03-03
1959-03-04
1959-03-05
1959-03-06
1959-03-07
1959-03-08
1959-03-09
1959-03-10
1959-03-11
1959-03-12
1959-03-13
1959-03-14
1959-03-15
1959-03-16
1959-03-17
1959-03-18
1959-03-19
1959-03-20
1959-03-21
1959-03-22
1959-03-23
1959-03-24
1959-03-25
1959-03-26
1959-03-27
1959-03-28
1959-03-29
1959-03-30
1959-03-31
1959-04-01
1959-04-02
1959-04-03
1959-04-04
1959-04-05
1959-04-06
1959-04-07
1959-04-08
1959-04-09
1959-04-10
1959-04-11
1959-04-12
1959-04-13
1959-04-14
1959-04-15
1959-04-16
1959-04-17
1959-04-18
1959-04-19
1959-04-20
1959-04-21
1959-04-22
1959-04-23
1959-04-24
1959-04-25
1959-04-26
1959-04-27
1959-04-28
1959-04-29
1959-04-30
1959-05-01
1959-05-02
1959-05-03
1959-05-04
1959-05-05
1959-05-06
1959-05-07
1959-05-08
1959-05-09
1959-05-10
1959-05-11
1959-05-12
1959-05-13
1959-05-14
1959-05-15
1959-05-16
1959-05-17
1959-05-18
1959-05-19
1959-05-20
1959-05-21
1959-05-22
1959-05-23
1959-05-24
1959-05-25
1959-05-26
1959-05-27
1959-05-28
1959-05-29
1959-05-30
1959-05-31
1959-06-01
1959-06-02
1959-06-03
1959-06-04
1959-06-05
1959-06-06
1959-06-07
1959-06-08
1959-06-09
1959-06-10
1959-06-11
1959-06-12
1959-06-13
1959-06-14
1959-06-15
1959-06-16
1959-06-17
1959-06-18
1959-06-19
1959-06-20
1959-06-21
1959-06-22
1959-06-23
1959-06-24
1959-06-25
1959-06-26
1959-06-27
1959-06-28
1959-06-29
1959-06-30
1959-07-01
1959-07-02
1959-07-03
1959-07-04
1959-07-05
1959-07-06
1959-07-07
1959-07-08
1959-07-09
1959-07-10
1959-07-11
1959-07-12
1959-07-13
1959-07-14
1959-07-15
1959-07-16
1959-07-17
1959-07-18
1959-07-19
1959-07-20
1959-07-21
1959-07-22
1959-07-23
1959-07-24
1959-07-25
1959-07-26
1959-07-27
1959-07-28
1959-07-29
1959-07-30
1959-07-31
1959-08-01
1959-08-02
1959-08-03
1959-08-04
1959-08-05
1959-08-06
1959-08-07
1959-08-08
1959-08-09
1959-08-10
1959-08-11
1959-08-12
1959-08-13
1959-08-14
1959-08-15
1959-08-16
1959-08-17
1959-08-18
1959-08-19
1959-08-20
1959-08-21
1959-08-22
1959-08-23
1959-08-24
1959-08-25
1959-08-26
1959-08-27
1959-08-28
1959-08-29
1959-08-30
1959-08-31
1959-09-01
1959-09-02
1959-09-03
1959-09-04
1959-09-05
1959-09-06
1959-09-07
1959-09-08
1959-09-09
1959-09-10
1959-09-11
1959-09-12
1959-09-13
1959-09-14
1959-09-15
1959-09-16
1959-09-17
1959-09-18
1959-09-19
1959-09-20
1959-09-21
1959-09-22
1959-09-23
1959-09-24
1959-09-25
1959-09-26
1959-09-27
1959-09-28
1959-09-29
1959-09-30
1959-10-01
1959-10-02
1959-10-03
1959-10-04
1959-10-05
1959-10-06
1959-10-07
1959-10-08
1959-10-09
1959-10-10
1959-10-11
1959-10-12
1959-10-13
1959-10-14
1959-10-15
1959-10-16
1959-10-17
1959-10-18
1959-10-19
1959-10-20
1959-10-21
1959-10-22
1959-10-23
1959-10-24
1959-10-25
1959-10-26
1959-10-27
1959-10-28
1959-10-29
1959-10-30
1959-10-31
1959-11-01
1959-11-02
1959-11-03
1959-11-04
1959-11-05
1959-11-06
1959-11-07
1959-11-08
1959-11-09
1959-11-10
1959-11-11
1959-11-12
1959-11-13
1959-11-14
1959-11-15
1959-11-16
1959-11-17
1959-11-18
1959-11-19
1959-11-20
1959-11-21
1959-11-22
1959-11-23
1959-11-24
1959-11-25
1959-11-26
1959-11-27
1959-11-28
1959-11-29
1959-11-30
1959-12-01
1959-12-02
1959-12-03
1959-12-04
1959-12-05
1959-12-06
1959-12-07
1959-12-08
1959-12-09
1959-12-10
1959-12-11
1959-12-12
1959-12-13
1959-12-14
1959-12-15
1959-12-16
1959-12-17
1959-12-18
1959-12-19
1959-12-20
1959-12-21
1959-12-22
1959-12-23
1959-12-24
1959-12-25
1959-12-26
1959-12-27
1959-12-28
1959-12-29
1959-12-30
1959-12-31
1960-01-01
1960-01-02
1960-01-03
1960-01-04
1960-01-05
1960-01-06
1960-01-07
1960-01-08
1960-01-09
1960-01-10
1960-01-11
1960-01-12
1960-01-13
1960-01-14
1960-01-15
1960-01-16
1960-01-17
1960-01-18
1960-01-19
1960-01-20
1960-01-21
1960-01-22
1960-01-23
1960-01-24
1960-01-25
1960-01-26
1960-01-27
1960-01-28
1960-01-29
1960-01-30
1960-01-31
1960-02-01
1960-02-02
1960-02-03
1960-02-04
1960-02-05
1960-02-06
1960-02-07
1960-02-08
1960-02-09
1960-02-10
1960-02-11
1960-02-12
1960-02-13
1960-02-14
1960-02-15
1960-02-16
1960-02-17
1960-02-18
1960-02-19
1960-02-20
1960-02-21
1960-02-22
1960-02-23
1960-02-24
1960-02-25
1960-02-26
1960-02-27
1960-02-28
1960-02-29
1960-03-01
1960-03-02
1960-03-03
1960-03-04
1960-03-05
1960-03-06
1960-03-07
1960-03-08
1960-03-09
1960-03-10
1960-03-11
1960-03-12
1960-03-13
1960-03-14
1960-03-15
1960-03-16
1960-03-17
1960-03-18
1960-03-19
1960-03-20
1960-03-21
1960-03-22
1960-03-23
1960-03-24
1960-03-25
1960-03-26
1960-03-27
1960-03-28
1960-03-29
1960-03-30
1960-03-31
1960-04-01
1960-04-02
1960-04-03
1960-04-04
1960-04-05
1960-04-06
1960-04-07
1960-04-08
1960-04-09
1960-04-10
1960-04-11
1960-04-12
1960-04-13
1960-04-14
1960-04-15
1960-04-16
1960-04-17
1960-04-18
1960-04-19
1960-04-20
1960-04-21
1960-04-22
1960-04-23
1960-04-24
1960-04-25
1960-04-26
1960-04-27
1960-04-28
1960-04-29
1960-04-30
1960-05-01
1960-05-02
1960-05-03
1960-05-04
1960-05-05
1960-05-06
1960-05-07
1960-05-08
1960-05-09
1960-05-10
1960-05-11
1960-05-12
1960-05-13
1960-05-14
1960-05-15
1960-05-16
1960-05-17
1960-05-18
1960-05-19
1960-05-20
1960-05-21
1960-05-22
1960-05-23
1960-05-24
1960-05-25
1960-05-26
1960-05-27
1960-05-28
1960-05-29
1960-05-30
1960-05-31
1960-06-01
1960-06-02
1960-06-03
1960-06-04
1960-06-05
1960-06-06
1960-06-07
1960-06-08
1960-06-09
1960-06-10
1960-06-11
1960-06-12
1960-06-13
1960-06-14
1960-06-15
1960-06-16
1960-06-17
1960-06-18
1960-06-19
1960-06-20
1960-06-21
1960-06-22
1960-06-23
1960-06-24
1960-06-25
1960-06-26
1960-06-27
1960-06-28
1960-06-29
1960-06-30
1960-07-01
1960-07-02
1960-07-03
1960-07-04
1960-07-05
1960-07-06
1960-07-07
1960-07-08
1960-07-09
1960-07-10
1960-07-11
1960-07-12
1960-07-13
1960-07-14
1960-07-15
1960-07-16
1960-07-17
1960-07-18
1960-07-19
1960-07-20
1960-07-21
1960-07-22
1960-07-23
1960-07-24
1960-07-25
1960-07-26
1960-07-27
1960-07-28
1960-07-29
1960-07-30
1960-07-31
1960-08-01
1960-08-02
1960-08-03
1960-08-04
1960-08-05
1960-08-06
1960-08-07
1960-08-08
1960-08-09
1960-08-10
1960-08-11
1960-08-12
1960-08-13
1960-08-14
1960-08-15
1960-08-16
1960-08-17
1960-08-18
1960-08-19
1960-08-20
1960-08-21
1960-08-22
1960-08-23
1960-08-24
1960-08-25
1960-08-26
1960-08-27
1960-08-28
1960-08-29
1960-08-30
1960-08-31
1960-09-01
1960-09-02
1960-09-03
1960-09-04
1960-09-05
1960-09-06
1960-09-07
1960-09-08
1960-09-09
1960-09-10
1960-09-11
1960-09-12
1960-09-13
1960-09-14
1960-09-15
1960-09-16
1960-09-17
1960-09-18
1960-09-19
1960-09-20
1960-09-21
1960-09-22
1960-09-23
1960-09-24
1960-09-25
1960-09-26
1960-09-27
1960-09-28
1960-09-29
1960-09-30
1960-10-01
1960-10-02
1960-10-03
1960-10-04
1960-10-05
1960-10-06
1960-10-07
1960-10-08
1960-10-09
1960-10-10
1960-10-11
1960-10-12
1960-10-13
1960-10-14
1960-10-15
1960-10-16
1960-10-17
1960-10-18
1960-10-19
1960-10-20
1960-10-21
1960-10-22
1960-10-23
1960-10-24
1960-10-25
1960-10-26
1960-10-27
1960-10-28
1960-10-29
1960-10-30
1960-10-31
1960-11-01
1960-11-02
1960-11-03
1960-11-04
1960-11-05
1960-11-06
1960-11-07
1960-11-08
1960-11-09
1960-11-10
1960-11-11
1960-11-12
1960-11-13
1960-11-14
1960-11-15
1960-11-16
1960-11-17
1960-11-18
1960-11-19
1960-11-20
1960-11-21
1960-11-22
1960-11-23
1960-11-24
1960-11-25
1960-11-26
1960-11-27
1960-11-28
1960-11-29
1960-11-30
1960-12-01
1960-12-02
1960-12-03
1960-12-04
1960-12-05
1960-12-06
1960-12-07
1960-12-08
1960-12-09
1960-12-10
1960-12-11
1960-12-12
1960-12-13
1960-12-14
1960-12-15
1960-12-16
1960-12-17
1960-12-18
1960-12-19
1960-12-20
1960-12-21
1960-12-22
1960-12-23
1960-12-24
1960-12-25
1960-12-26
1960-12-27
1960-12-28
1960-12-29
1960-12-30
1960-12-31
1961-01-01
1961-01-02
1961-01-03
1961-01-04
1961-01-05
1961-01-06
1961-01-07
1961-01-08
1961-01-09
1961-01-10
1961-01-11
1961-01-12
1961-01-13
1961-01-14
1961-01-15
1961-01-16
1961-01-17
1961-01-18
1961-01-19
1961-01-20
1961-01-21
1961-01-22
1961-01-23
1961-01-24
1961-01-25
1961-01-26
1961-01-27
1961-01-28
1961-01-29
1961-01-30
1961-01-31
1961-02-01
1961-02-02
1961-02-03
1961-02-04
1961-02-05
1961-02-06
1961-02-07
1961-02-08
1961-02-09
1961-02-10
1961-02-11
1961-02-12
1961-02-13
1961-02-14
1961-02-15
1961-02-16
1961-02-17
1961-02-18
1961-02-19
1961-02-20
1961-02-21
1961-02-22
1961-02-23
1961-02-24
1961-02-25
1961-02-26
1961-02-27
1961-02-28
1961-03-01
1961-03-02
1961-03-03
1961-03-04
1961-03-05
1961-03-06
1961-03-07
1961-03-08
1961-03-09
1961-03-10
1961-03-11
[truncated: 19,896 more rows]

## Sheet: Precipitation
Precipitation [mm]		9035284	9135022	60652	9035079	9135008	9135010	9135013	9135035	9035303	9035302	9035264	9035265	9035085	9135012	9135030	9135026	9134011	9134012	9134027	9135020	9134019	90172	90173	90045	90049	90062	90063
	9035031	60682	60754	9035241	60579	60745	60747	60750	60761	60699	60698	60670	60671		60749	60758	60756	60727	60728	60734	60753	60731	9134029	9134016	9133000	9133004	9134026	9134033
	DANSON K.NGUGI SAW MILL,ELBURG.	MULOT POLICE POST	NAIKARA AFRICA GOSPEL CHURCH	Baraget forest station	SOTIK, TENWIK MISSION	SOTIK,KABOSON GOSPEL MISSION	SOTIK, AITONG VET. HOUSE	NAROK,KEEKOROK GAME LODGE	KICHWA TEMBO CAMP	NAROTIA FOREST STATION	NYANGORES FOREST STATION	SOTIK WATER SUPPLY	BOMET WATER SUPPLY	OLEGURUOE D.O'S OFFICE	TALEK CAMP NAROK	MARA SERENA LODGE	GOVERNOR'S CAMP	SOTIK DIV AGRI OFFICE	TARANGANYA SEC. SCHOOL	LOLGORIEN POLICE POST	ENTASEKERA CHIEF'S CAMP	NTIMARU CHIEF'S OFFICE	BUHEMBA TR.CENTRE	KISAKA NGURUIME	MUSOMA MET.	NYABANGI MISSION	TARIME HYDROMET	MUGUMU PRIMARY SCHOOL
	35.8	35.4333	35.6333	35.73	35.3667	35.2333	35.25	35.2333	35.0167	35.5333	35.4333	35.1167	35.35	35.6833	35.25	35.1167	35.0833	34.8833	34.6	34.8167	35.8333	34.6833	34.0833	34.4667	33.8	33.8667	34.3333	34.7167
	-0.38333	-0.93333	-1.55	-0.42	-0.75	-1	-1.18333	-1.58333	-1.23333	-0.76666	-0.7	-0.683333	-0.783333	-0.583333	-1.45	-1.25	-1.28333	-1	-1.23333	-1.23333	-1.83333	-1.33333	-1.76667	-1.56667	-1.5	-1.55	-1.33333	-1.86667
1959-02-01	To receive the data in order to verify the analysis and model results of this paper, please feel free contact us (T.A.Bogaard@tudelft.nl).
1959-02-02
1959-02-03
1959-02-04
1959-02-05
1959-02-06
1959-02-07
1959-02-08
1959-02-09
1959-02-10
1959-02-11
1959-02-12
1959-02-13
1959-02-14
1959-02-15
1959-02-16
1959-02-17
1959-02-18
1959-02-19
1959-02-20
1959-02-21
1959-02-22
1959-02-23
1959-02-24
1959-02-25
1959-02-26
1959-02-27
1959-02-28
1959-03-01
1959-03-02
1959-03-03
1959-03-04
1959-03-05
1959-03-06
1959-03-07
1959-03-08
1959-03-09
1959-03-10
1959-03-11
1959-03-12
1959-03-13
1959-03-14
1959-03-15
1959-03-16
1959-03-17
1959-03-18
1959-03-19
1959-03-20
1959-03-21
1959-03-22
1959-03-23
1959-03-24
1959-03-25
1959-03-26
1959-03-27
1959-03-28
1959-03-29
1959-03-30
1959-03-31
1959-04-01
1959-04-02
1959-04-03
1959-04-04
1959-04-05
1959-04-06
1959-04-07
1959-04-08
1959-04-09
1959-04-10
1959-04-11
1959-04-12
1959-04-13
1959-04-14
1959-04-15
1959-04-16
1959-04-17
1959-04-18
1959-04-19
1959-04-20
1959-04-21
1959-04-22
1959-04-23
1959-04-24
1959-04-25
1959-04-26
1959-04-27
1959-04-28
1959-04-29
1959-04-30
1959-05-01
1959-05-02
1959-05-03
1959-05-04
1959-05-05
1959-05-06
1959-05-07
1959-05-08
1959-05-09
1959-05-10
1959-05-11
1959-05-12
1959-05-13
1959-05-14
1959-05-15
1959-05-16
1959-05-17
1959-05-18
1959-05-19
1959-05-20
1959-05-21
1959-05-22
1959-05-23
1959-05-24
1959-05-25
1959-05-26
1959-05-27
1959-05-28
1959-05-29
1959-05-30
1959-05-31
1959-06-01
1959-06-02
1959-06-03
1959-06-04
1959-06-05
1959-06-06
1959-06-07
1959-06-08
1959-06-09
1959-06-10
1959-06-11
1959-06-12
1959-06-13
1959-06-14
1959-06-15
1959-06-16
1959-06-17
1959-06-18
1959-06-19
1959-06-20
1959-06-21
1959-06-22
1959-06-23
1959-06-24
1959-06-25
1959-06-26
1959-06-27
1959-06-28
1959-06-29
1959-06-30
1959-07-01
1959-07-02
1959-07-03
1959-07-04
1959-07-05
1959-07-06
1959-07-07
1959-07-08
1959-07-09
1959-07-10
1959-07-11
1959-07-12
1959-07-13
1959-07-14
1959-07-15
1959-07-16
1959-07-17
1959-07-18
1959-07-19
1959-07-20
1959-07-21
1959-07-22
1959-07-23
1959-07-24
1959-07-25
1959-07-26
1959-07-27
1959-07-28
1959-07-29
1959-07-30
1959-07-31
1959-08-01
1959-08-02
1959-08-03
1959-08-04
1959-08-05
1959-08-06
1959-08-07
1959-08-08
1959-08-09
1959-08-10
1959-08-11
1959-08-12
1959-08-13
1959-08-14
1959-08-15
1959-08-16
1959-08-17
1959-08-18
1959-08-19
1959-08-20
1959-08-21
1959-08-22
1959-08-23
1959-08-24
1959-08-25
1959-08-26
1959-08-27
1959-08-28
1959-08-29
1959-08-30
1959-08-31
1959-09-01
1959-09-02
1959-09-03
1959-09-04
1959-09-05
1959-09-06
1959-09-07
1959-09-08
1959-09-09
1959-09-10
1959-09-11
1959-09-12
1959-09-13
1959-09-14
1959-09-15
1959-09-16
1959-09-17
1959-09-18
1959-09-19
1959-09-20
1959-09-21
1959-09-22
1959-09-23
1959-09-24
1959-09-25
1959-09-26
1959-09-27
1959-09-28
1959-09-29
1959-09-30
1959-10-01
1959-10-02
1959-10-03
1959-10-04
1959-10-05
1959-10-06
1959-10-07
1959-10-08
1959-10-09
1959-10-10
1959-10-11
1959-10-12
1959-10-13
1959-10-14
1959-10-15
1959-10-16
1959-10-17
1959-10-18
1959-10-19
1959-10-20
1959-10-21
1959-10-22
1959-10-23
1959-10-24
1959-10-25
1959-10-26
1959-10-27
1959-10-28
1959-10-29
1959-10-30
1959-10-31
1959-11-01
1959-11-02
1959-11-03
1959-11-04
1959-11-05
1959-11-06
1959-11-07
1959-11-08
1959-11-09
1959-11-10
1959-11-11
1959-11-12
1959-11-13
1959-11-14
1959-11-15
1959-11-16
1959-11-17
1959-11-18
1959-11-19
1959-11-20
1959-11-21
1959-11-22
1959-11-23
1959-11-24
1959-11-25
1959-11-26
1959-11-27
1959-11-28
1959-11-29
1959-11-30
1959-12-01
1959-12-02
1959-12-03
1959-12-04
1959-12-05
1959-12-06
1959-12-07
1959-12-08
1959-12-09
1959-12-10
1959-12-11
1959-12-12
1959-12-13
1959-12-14
1959-12-15
1959-12-16
1959-12-17
1959-12-18
1959-12-19
1959-12-20
1959-12-21
1959-12-22
1959-12-23
1959-12-24
1959-12-25
1959-12-26
1959-12-27
1959-12-28
1959-12-29
1959-12-30
1959-12-31
1960-01-01
1960-01-02
1960-01-03
1960-01-04
1960-01-05
1960-01-06
1960-01-07
1960-01-08
1960-01-09
1960-01-10
1960-01-11
1960-01-12
1960-01-13
1960-01-14
1960-01-15
1960-01-16
1960-01-17
1960-01-18
1960-01-19
1960-01-20
1960-01-21
1960-01-22
1960-01-23
1960-01-24
1960-01-25
1960-01-26
1960-01-27
1960-01-28
1960-01-29
1960-01-30
1960-01-31
1960-02-01
1960-02-02
1960-02-03
1960-02-04
1960-02-05
1960-02-06
1960-02-07
1960-02-08
1960-02-09
1960-02-10
1960-02-11
1960-02-12
1960-02-13
1960-02-14
1960-02-15
1960-02-16
1960-02-17
1960-02-18
1960-02-19
1960-02-20
1960-02-21
1960-02-22
1960-02-23
1960-02-24
1960-02-25
1960-02-26
1960-02-27
1960-02-28
1960-02-29
1960-03-01
1960-03-02
1960-03-03
1960-03-04
1960-03-05
1960-03-06
1960-03-07
1960-03-08
1960-03-09
1960-03-10
1960-03-11
1960-03-12
1960-03-13
1960-03-14
1960-03-15
1960-03-16
1960-03-17
1960-03-18
1960-03-19
1960-03-20
1960-03-21
1960-03-22
1960-03-23
1960-03-24
1960-03-25
1960-03-26
1960-03-27
1960-03-28
1960-03-29
1960-03-30
1960-03-31
1960-04-01
1960-04-02
1960-04-03
1960-04-04
1960-04-05
1960-04-06
1960-04-07
1960-04-08
1960-04-09
1960-04-10
1960-04-11
1960-04-12
1960-04-13
1960-04-14
1960-04-15
1960-04-16
1960-04-17
1960-04-18
1960-04-19
1960-04-20
1960-04-21
1960-04-22
1960-04-23
1960-04-24
1960-04-25
1960-04-26
1960-04-27
1960-04-28
1960-04-29
1960-04-30
1960-05-01
1960-05-02
1960-05-03
1960-05-04
1960-05-05
1960-05-06
1960-05-07
1960-05-08
1960-05-09
1960-05-10
1960-05-11
1960-05-12
1960-05-13
1960-05-14
1960-05-15
1960-05-16
1960-05-17
1960-05-18
1960-05-19
1960-05-20
1960-05-21
1960-05-22
1960-05-23
1960-05-24
1960-05-25
1960-05-26
1960-05-27
1960-05-28
1960-05-29
1960-05-30
1960-05-31
1960-06-01
1960-06-02
1960-06-03
1960-06-04
1960-06-05
1960-06-06
1960-06-07
1960-06-08
1960-06-09
1960-06-10
1960-06-11
1960-06-12
1960-06-13
1960-06-14
1960-06-15
1960-06-16
1960-06-17
1960-06-18
1960-06-19
1960-06-20
1960-06-21
1960-06-22
1960-06-23
1960-06-24
1960-06-25
1960-06-26
1960-06-27
1960-06-28
1960-06-29
1960-06-30
1960-07-01
1960-07-02
1960-07-03
1960-07-04
1960-07-05
1960-07-06
1960-07-07
1960-07-08
1960-07-09
1960-07-10
1960-07-11
1960-07-12
1960-07-13
1960-07-14
1960-07-15
1960-07-16
1960-07-17
1960-07-18
1960-07-19
1960-07-20
1960-07-21
1960-07-22
1960-07-23
1960-07-24
1960-07-25
1960-07-26
1960-07-27
1960-07-28
1960-07-29
1960-07-30
1960-07-31
1960-08-01
1960-08-02
1960-08-03
1960-08-04
1960-08-05
1960-08-06
1960-08-07
1960-08-08
1960-08-09
1960-08-10
1960-08-11
1960-08-12
1960-08-13
1960-08-14
1960-08-15
1960-08-16
1960-08-17
1960-08-18
1960-08-19
1960-08-20
1960-08-21
1960-08-22
1960-08-23
1960-08-24
1960-08-25
1960-08-26
1960-08-27
1960-08-28
1960-08-29
1960-08-30
1960-08-31
1960-09-01
1960-09-02
1960-09-03
1960-09-04
1960-09-05
1960-09-06
1960-09-07
1960-09-08
1960-09-09
1960-09-10
1960-09-11
1960-09-12
1960-09-13
1960-09-14
1960-09-15
1960-09-16
1960-09-17
1960-09-18
1960-09-19
1960-09-20
1960-09-21
1960-09-22
1960-09-23
1960-09-24
1960-09-25
1960-09-26
1960-09-27
1960-09-28
1960-09-29
1960-09-30
1960-10-01
1960-10-02
1960-10-03
1960-10-04
1960-10-05
1960-10-06
1960-10-07
1960-10-08
1960-10-09
1960-10-10
1960-10-11
1960-10-12
1960-10-13
1960-10-14
1960-10-15
1960-10-16
1960-10-17
1960-10-18
1960-10-19
1960-10-20
1960-10-21
1960-10-22
1960-10-23
1960-10-24
1960-10-25
1960-10-26
1960-10-27
1960-10-28
1960-10-29
1960-10-30
1960-10-31
1960-11-01
1960-11-02
1960-11-03
1960-11-04
1960-11-05
1960-11-06
1960-11-07
1960-11-08
1960-11-09
1960-11-10
1960-11-11
1960-11-12
1960-11-13
1960-11-14
1960-11-15
1960-11-16
1960-11-17
1960-11-18
1960-11-19
1960-11-20
1960-11-21
1960-11-22
1960-11-23
1960-11-24
1960-11-25
1960-11-26
1960-11-27
1960-11-28
1960-11-29
1960-11-30
1960-12-01
1960-12-02
1960-12-03
1960-12-04
1960-12-05
1960-12-06
1960-12-07
1960-12-08
1960-12-09
1960-12-10
1960-12-11
1960-12-12
1960-12-13
1960-12-14
1960-12-15
1960-12-16
1960-12-17
1960-12-18
1960-12-19
1960-12-20
1960-12-21
1960-12-22
1960-12-23
1960-12-24
1960-12-25
1960-12-26
1960-12-27
1960-12-28
1960-12-29
1960-12-30
1960-12-31
1961-01-01
1961-01-02
1961-01-03
1961-01-04
1961-01-05
1961-01-06
1961-01-07
1961-01-08
1961-01-09
1961-01-10
1961-01-11
1961-01-12
1961-01-13
1961-01-14
1961-01-15
1961-01-16
1961-01-17
1961-01-18
1961-01-19
1961-01-20
1961-01-21
1961-01-22
1961-01-23
1961-01-24
1961-01-25
1961-01-26
1961-01-27
1961-01-28
1961-01-29
1961-01-30
1961-01-31
1961-02-01
1961-02-02
1961-02-03
1961-02-04
1961-02-05
1961-02-06
1961-02-07
1961-02-08
1961-02-09
1961-02-10
1961-02-11
1961-02-12
1961-02-13
1961-02-14
1961-02-15
1961-02-16
1961-02-17
1961-02-18
1961-02-19
1961-02-20
1961-02-21
1961-02-22
1961-02-23
1961-02-24
1961-02-25
1961-02-26
1961-02-27
1961-02-28
1961-03-01
1961-03-02
1961-03-03
1961-03-04
1961-03-05
1961-03-06
1961-03-07
1961-03-08
1961-03-09
1961-03-10
1961-03-11
1961-03-12
1961-03-13
1961-03-14
1961-03-15
1961-03-16
1961-03-17
1961-03-18
1961-03-19
1961-03-20
1961-03-21
1961-03-22
1961-03-23
1961-03-24
1961-03-25
1961-03-26
1961-03-27
1961-03-28
1961-03-29
1961-03-30
1961-03-31
1961-04-01
1961-04-02
1961-04-03
1961-04-04
1961-04-05
1961-04-06
1961-04-07
1961-04-08
1961-04-09
1961-04-10
1961-04-11
1961-04-12
1961-04-13
1961-04-14
1961-04-15
1961-04-16
1961-04-17
1961-04-18
1961-04-19
1961-04-20
1961-04-21
1961-04-22
1961-04-23
1961-04-24
1961-04-25
1961-04-26
1961-04-27
1961-04-28
1961-04-29
1961-04-30
1961-05-01
1961-05-02
1961-05-03
1961-05-04
1961-05-05
1961-05-06
1961-05-07
1961-05-08
1961-05-09
1961-05-10
1961-05-11
1961-05-12
1961-05-13
1961-05-14
1961-05-15
1961-05-16
1961-05-17
1961-05-18
1961-05-19
1961-05-20
1961-05-21
1961-05-22
1961-05-23
1961-05-24
1961-05-25
1961-05-26
1961-05-27
1961-05-28
1961-05-29
1961-05-30
1961-05-31
1961-06-01
1961-06-02
1961-06-03
1961-06-04
1961-06-05
1961-06-06
1961-06-07
1961-06-08
1961-06-09
1961-06-10
1961-06-11
1961-06-12
1961-06-13
1961-06-14
1961-06-15
1961-06-16
1961-06-17
1961-06-18
1961-06-19
1961-06-20
1961-06-21
1961-06-22
1961-06-23
1961-06-24
1961-06-25
1961-06-26
1961-06-27
1961-06-28
1961-06-29
1961-06-30
1961-07-01
1961-07-02
1961-07-03
1961-07-04
1961-07-05
1961-07-06
1961-07-07
1961-07-08
1961-07-09
1961-07-10
1961-07-11
1961-07-12
1961-07-13
1961-07-14
1961-07-15
1961-07-16
1961-07-17
1961-07-18
1961-07-19
1961-07-20
1961-07-21
1961-07-22
1961-07-23
1961-07-24
1961-07-25
1961-07-26
1961-07-27
1961-07-28
1961-07-29
1961-07-30
1961-07-31
1961-08-01
1961-08-02
1961-08-03
1961-08-04
1961-08-05
1961-08-06
1961-08-07
1961-08-08
1961-08-09
1961-08-10
1961-08-11
1961-08-12
1961-08-13
1961-08-14
1961-08-15
1961-08-16
1961-08-17
1961-08-18
1961-08-19
1961-08-20
1961-08-21
1961-08-22
1961-08-23
1961-08-24
1961-08-25
1961-08-26
1961-08-27
1961-08-28
1961-08-29
1961-08-30
1961-08-31
1961-09-01
1961-09-02
1961-09-03
1961-09-04
1961-09-05
1961-09-06
1961-09-07
1961-09-08
1961-09-09
1961-09-10
1961-09-11
1961-09-12
1961-09-13
1961-09-14
1961-09-15
1961-09-16
1961-09-17
1961-09-18
1961-09-19
1961-09-20
1961-09-21
1961-09-22
1961-09-23
1961-09-24
1961-09-25
1961-09-26
1961-09-27
1961-09-28
1961-09-29
1961-09-30
1961-10-01
1961-10-02
1961-10-03
1961-10-04
1961-10-05
1961-10-06
1961-10-07
1961-10-08
1961-10-09
1961-10-10
1961-10-11
1961-10-12
1961-10-13
1961-10-14
1961-10-15
1961-10-16
1961-10-17
1961-10-18
1961-10-19
1961-10-20
1961-10-21
1961-10-22
1961-10-23
1961-10-24
1961-10-25
1961-10-26
1961-10-27
1961-10-28
1961-10-29
1961-10-30
1961-10-31
1961-11-01
1961-11-02
1961-11-03
1961-11-04
1961-11-05
1961-11-06
1961-11-07
1961-11-08
1961-11-09
1961-11-10
1961-11-11
1961-11-12
1961-11-13
1961-11-14
1961-11-15
1961-11-16
1961-11-17
1961-11-18
1961-11-19
1961-11-20
1961-11-21
1961-11-22
1961-11-23
1961-11-24
1961-11-25
1961-11-26
1961-11-27
1961-11-28
1961-11-29
1961-11-30
1961-12-01
1961-12-02
1961-12-03
1961-12-04
1961-12-05
1961-12-06
1961-12-07
1961-12-08
1961-12-09
1961-12-10
1961-12-11
1961-12-12
1961-12-13
1961-12-14
1961-12-15
1961-12-16
1961-12-17
1961-12-18
1961-12-19
1961-12-20
1961-12-21
1961-12-22
1961-12-23
1961-12-24
1961-12-25
1961-12-26
1961-12-27
1961-12-28
1961-12-29
1961-12-30
1961-12-31
1962-01-01
1962-01-02
1962-01-03
1962-01-04
1962-01-05
1962-01-06
1962-01-07
1962-01-08
1962-01-09
1962-01-10
1962-01-11
1962-01-12
1962-01-13
1962-01-14
1962-01-15
1962-01-16
1962-01-17
1962-01-18
1962-01-19
1962-01-20
1962-01-21
1962-01-22
1962-01-23
1962-01-24
1962-01-25
1962-01-26
1962-01-27
1962-01-28
1962-01-29
1962-01-30
1962-01-31
1962-02-01
1962-02-02
1962-02-03
1962-02-04
1962-02-05
1962-02-06
1962-02-07
1962-02-08
1962-02-09
1962-02-10
1962-02-11
1962-02-12
1962-02-13
1962-02-14
1962-02-15
1962-02-16
1962-02-17
1962-02-18
1962-02-19
1962-02-20
1962-02-21
1962-02-22
1962-02-23
1962-02-24
1962-02-25
1962-02-26
1962-02-27
1962-02-28
1962-03-01
1962-03-02
1962-03-03
1962-03-04
1962-03-05
1962-03-06
1962-03-07
1962-03-08
1962-03-09
1962-03-10
1962-03-11
1962-03-12
1962-03-13
1962-03-14
1962-03-15
1962-03-16
1962-03-17
1962-03-18
1962-03-19
1962-03-20
1962-03-21
1962-03-22
1962-03-23
1962-03-24
1962-03-25
1962-03-26
1962-03-27
1962-03-28
1962-03-29
1962-03-30
1962-03-31
1962-04-01
1962-04-02
1962-04-03
1962-04-04
1962-04-05
1962-04-06
1962-04-07
1962-04-08
1962-04-09
1962-04-10
1962-04-11
1962-04-12
1962-04-13
1962-04-14
1962-04-15
1962-04-16
1962-04-17
1962-04-18
1962-04-19
1962-04-20
1962-04-21
1962-04-22
1962-04-23
1962-04-24
1962-04-25
1962-04-26
1962-04-27
1962-04-28
1962-04-29
1962-04-30
1962-05-01
1962-05-02
1962-05-03
1962-05-04
1962-05-05
1962-05-06
1962-05-07
1962-05-08
1962-05-09
1962-05-10
1962-05-11
1962-05-12
1962-05-13
1962-05-14
1962-05-15
1962-05-16
1962-05-17
1962-05-18
1962-05-19
1962-05-20
1962-05-21
1962-05-22
1962-05-23
1962-05-24
1962-05-25
1962-05-26
1962-05-27
1962-05-28
1962-05-29
1962-05-30
1962-05-31
1962-06-01
1962-06-02
1962-06-03
1962-06-04
1962-06-05
1962-06-06
1962-06-07
1962-06-08
1962-06-09
1962-06-10
1962-06-11
1962-06-12
1962-06-13
1962-06-14
1962-06-15
1962-06-16
1962-06-17
1962-06-18
1962-06-19
1962-06-20
1962-06-21
1962-06-22
1962-06-23
1962-06-24
1962-06-25
1962-06-26
1962-06-27
1962-06-28
1962-06-29
1962-06-30
1962-07-01
1962-07-02
1962-07-03
1962-07-04
1962-07-05
1962-07-06
1962-07-07
1962-07-08
1962-07-09
1962-07-10
1962-07-11
1962-07-12
1962-07-13
1962-07-14
1962-07-15
1962-07-16
1962-07-17
1962-07-18
1962-07-19
1962-07-20
1962-07-21
1962-07-22
1962-07-23
1962-07-24
1962-07-25
1962-07-26
1962-07-27
1962-07-28
1962-07-29
1962-07-30
1962-07-31
1962-08-01
1962-08-02
1962-08-03
1962-08-04
1962-08-05
1962-08-06
1962-08-07
1962-08-08
1962-08-09
1962-08-10
1962-08-11
1962-08-12
1962-08-13
1962-08-14
1962-08-15
1962-08-16
1962-08-17
1962-08-18
1962-08-19
1962-08-20
1962-08-21
1962-08-22
1962-08-23
1962-08-24
1962-08-25
1962-08-26
1962-08-27
1962-08-28
1962-08-29
1962-08-30
1962-08-31
1962-09-01
1962-09-02
1962-09-03
1962-09-04
1962-09-05
1962-09-06
1962-09-07
1962-09-08
1962-09-09
1962-09-10
1962-09-11
1962-09-12
1962-09-13
1962-09-14
1962-09-15
1962-09-16
1962-09-17
1962-09-18
1962-09-19
1962-09-20
1962-09-21
1962-09-22
1962-09-23
1962-09-24
1962-09-25
1962-09-26
1962-09-27
1962-09-28
1962-09-29
1962-09-30
1962-10-01
1962-10-02
1962-10-03
1962-10-04
1962-10-05
1962-10-06
1962-10-07
1962-10-08
1962-10-09
1962-10-10
1962-10-11
1962-10-12
1962-10-13
1962-10-14
1962-10-15
1962-10-16
1962-10-17
1962-10-18
1962-10-19
1962-10-20
1962-10-21
1962-10-22
1962-10-23
1962-10-24
1962-10-25
1962-10-26
1962-10-27
1962-10-28
1962-10-29
1962-10-30
1962-10-31
1962-11-01
1962-11-02
1962-11-03
1962-11-04
1962-11-05
1962-11-06
1962-11-07
1962-11-08
1962-11-09
1962-11-10
1962-11-11
1962-11-12
1962-11-13
1962-11-14
1962-11-15
1962-11-16
1962-11-17
1962-11-18
1962-11-19
1962-11-20
1962-11-21
1962-11-22
1962-11-23
1962-11-24
1962-11-25
1962-11-26
1962-11-27
1962-11-28
1962-11-29
1962-11-30
1962-12-01
1962-12-02
1962-12-03
1962-12-04
1962-12-05
1962-12-06
1962-12-07
1962-12-08
1962-12-09
1962-12-10
1962-12-11
1962-12-12
1962-12-13
1962-12-14
1962-12-15
1962-12-16
1962-12-17
1962-12-18
1962-12-19
1962-12-20
1962-12-21
1962-12-22
1962-12-23
1962-12-24
1962-12-25
1962-12-26
1962-12-27
1962-12-28
1962-12-29
1962-12-30
1962-12-31
1963-01-01
1963-01-02
1963-01-03
1963-01-04
1963-01-05
1963-01-06
1963-01-07
1963-01-08
1963-01-09
1963-01-10
1963-01-11
1963-01-12
1963-01-13
1963-01-14
1963-01-15
1963-01-16
1963-01-17
1963-01-18
1963-01-19
1963-01-20
1963-01-21
1963-01-22
1963-01-23
1963-01-24
1963-01-25
1963-01-26
1963-01-27
1963-01-28
1963-01-29
1963-01-30
1963-01-31
1963-02-01
1963-02-02
1963-02-03
1963-02-04
1963-02-05
1963-02-06
1963-02-07
1963-02-08
1963-02-09
1963-02-10
1963-02-11
1963-02-12
1963-02-13
1963-02-14
1963-02-15
1963-02-16
1963-02-17
1963-02-18
1963-02-19
1963-02-20
1963-02-21
1963-02-22
1963-02-23
1963-02-24
1963-02-25
1963-02-26
1963-02-27
1963-02-28
1963-03-01
1963-03-02
1963-03-03
1963-03-04
1963-03-05
1963-03-06
1963-03-07
1963-03-08
1963-03-09
1963-03-10
1963-03-11
1963-03-12
1963-03-13
1963-03-14
1963-03-15
1963-03-16
1963-03-17
1963-03-18
1963-03-19
1963-03-20
1963-03-21
1963-03-22
1963-03-23
1963-03-24
1963-03-25
1963-03-26
1963-03-27
1963-03-28
1963-03-29
1963-03-30
1963-03-31
1963-04-01
1963-04-02
1963-04-03
1963-04-04
1963-04-05
1963-04-06
1963-04-07
1963-04-08
1963-04-09
1963-04-10
1963-04-11
1963-04-12
1963-04-13
1963-04-14
1963-04-15
1963-04-16
1963-04-17
1963-04-18
1963-04-19
1963-04-20
1963-04-21
1963-04-22
1963-04-23
1963-04-24
1963-04-25
1963-04-26
1963-04-27
1963-04-28
1963-04-29
1963-04-30
1963-05-01
1963-05-02
1963-05-03
1963-05-04
1963-05-05
1963-05-06
1963-05-07
1963-05-08
1963-05-09
1963-05-10
1963-05-11
1963-05-12
1963-05-13
1963-05-14
1963-05-15
1963-05-16
1963-05-17
1963-05-18
1963-05-19
1963-05-20
1963-05-21
1963-05-22
1963-05-23
1963-05-24
1963-05-25
1963-05-26
1963-05-27
1963-05-28
1963-05-29
1963-05-30
1963-05-31
1963-06-01
1963-06-02
1963-06-03
1963-06-04
1963-06-05
1963-06-06
1963-06-07
1963-06-08
1963-06-09
1963-06-10
1963-06-11
1963-06-12
1963-06-13
1963-06-14
1963-06-15
1963-06-16
1963-06-17
1963-06-18
1963-06-19
1963-06-20
1963-06-21
1963-06-22
1963-06-23
1963-06-24
1963-06-25
1963-06-26
1963-06-27
1963-06-28
1963-06-29
1963-06-30
1963-07-01
1963-07-02
1963-07-03
1963-07-04
1963-07-05
1963-07-06
1963-07-07
1963-07-08
1963-07-09
1963-07-10
1963-07-11
1963-07-12
1963-07-13
1963-07-14
1963-07-15
1963-07-16
1963-07-17
1963-07-18
1963-07-19
1963-07-20
1963-07-21
1963-07-22
1963-07-23
1963-07-24
1963-07-25
1963-07-26
1963-07-27
1963-07-28
1963-07-29
1963-07-30
1963-07-31
1963-08-01
1963-08-02
1963-08-03
1963-08-04
1963-08-05
1963-08-06
1963-08-07
1963-08-08
1963-08-09
1963-08-10
1963-08-11
1963-08-12
1963-08-13
1963-08-14
1963-08-15
1963-08-16
1963-08-17
1963-08-18
1963-08-19
1963-08-20
1963-08-21
1963-08-22
1963-08-23
1963-08-24
1963-08-25
1963-08-26
1963-08-27
1963-08-28
1963-08-29
1963-08-30
1963-08-31
1963-09-01
1963-09-02
1963-09-03
1963-09-04
1963-09-05
1963-09-06
1963-09-07
1963-09-08
1963-09-09
1963-09-10
1963-09-11
1963-09-12
1963-09-13
1963-09-14
1963-09-15
1963-09-16
1963-09-17
1963-09-18
1963-09-19
1963-09-20
1963-09-21
1963-09-22
1963-09-23
1963-09-24
1963-09-25
1963-09-26
1963-09-27
1963-09-28
1963-09-29
1963-09-30
1963-10-01
1963-10-02
1963-10-03
1963-10-04
1963-10-05
1963-10-06
1963-10-07
1963-10-08
1963-10-09
1963-10-10
1963-10-11
1963-10-12
1963-10-13
1963-10-14
1963-10-15
1963-10-16
1963-10-17
1963-10-18
1963-10-19
1963-10-20
1963-10-21
1963-10-22
1963-10-23
1963-10-24
1963-10-25
1963-10-26
1963-10-27
1963-10-28
1963-10-29
1963-10-30
1963-10-31
1963-11-01
1963-11-02
1963-11-03
1963-11-04
1963-11-05
1963-11-06
1963-11-07
1963-11-08
1963-11-09
1963-11-10
1963-11-11
1963-11-12
1963-11-13
1963-11-14
1963-11-15
1963-11-16
1963-11-17
1963-11-18
1963-11-19
1963-11-20
1963-11-21
1963-11-22
1963-11-23
1963-11-24
1963-11-25
1963-11-26
1963-11-27
1963-11-28
1963-11-29
1963-11-30
1963-12-01
1963-12-02
1963-12-03
1963-12-04
1963-12-05
1963-12-06
1963-12-07
1963-12-08
1963-12-09
1963-12-10
1963-12-11
1963-12-12
1963-12-13
1963-12-14
1963-12-15
1963-12-16
1963-12-17
1963-12-18
1963-12-19
1963-12-20
1963-12-21
1963-12-22
1963-12-23
1963-12-24
1963-12-25
1963-12-26
1963-12-27
1963-12-28
1963-12-29
1963-12-30
1963-12-31
1964-01-01
1964-01-02
1964-01-03
1964-01-04
1964-01-05
1964-01-06
1964-01-07
1964-01-08
1964-01-09
1964-01-10
1964-01-11
1964-01-12
1964-01-13
1964-01-14
1964-01-15
1964-01-16
1964-01-17
1964-01-18
1964-01-19
1964-01-20
1964-01-21
1964-01-22
1964-01-23
1964-01-24
1964-01-25
1964-01-26
1964-01-27
1964-01-28
1964-01-29
1964-01-30
1964-01-31
1964-02-01
1964-02-02
1964-02-03
1964-02-04
1964-02-05
1964-02-06
1964-02-07
1964-02-08
1964-02-09
1964-02-10
1964-02-11
1964-02-12
1964-02-13
1964-02-14
1964-02-15
1964-02-16
1964-02-17
1964-02-18
1964-02-19
1964-02-20
1964-02-21
1964-02-22
1964-02-23
1964-02-24
1964-02-25
1964-02-26
1964-02-27
1964-02-28
1964-02-29
1964-03-01
1964-03-02
1964-03-03
1964-03-04
1964-03-05
1964-03-06
1964-03-07
1964-03-08
1964-03-09
1964-03-10
1964-03-11
1964-03-12
1964-03-13
1964-03-14
1964-03-15
1964-03-16
1964-03-17
1964-03-18
1964-03-19
1964-03-20
1964-03-21
1964-03-22
1964-03-23
1964-03-24
1964-03-25
1964-03-26
1964-03-27
1964-03-28
1964-03-29
1964-03-30
1964-03-31
1964-04-01
1964-04-02
1964-04-03
1964-04-04
1964-04-05
1964-04-06
1964-04-07
1964-04-08
1964-04-09
1964-04-10
1964-04-11
1964-04-12
1964-04-13
1964-04-14
1964-04-15
1964-04-16
1964-04-17
1964-04-18
1964-04-19
1964-04-20
1964-04-21
1964-04-22
1964-04-23
1964-04-24
1964-04-25
1964-04-26
1964-04-27
1964-04-28
1964-04-29
1964-04-30
1964-05-01
1964-05-02
1964-05-03
1964-05-04
1964-05-05
1964-05-06
1964-05-07
1964-05-08
1964-05-09
1964-05-10
1964-05-11
1964-05-12
1964-05-13
1964-05-14
1964-05-15
1964-05-16
1964-05-17
1964-05-18
1964-05-19
1964-05-20
1964-05-21
1964-05-22
1964-05-23
1964-05-24
1964-05-25
1964-05-26
1964-05-27
1964-05-28
1964-05-29
1964-05-30
1964-05-31
1964-06-01
1964-06-02
1964-06-03
1964-06-04
1964-06-05
1964-06-06
1964-06-07
1964-06-08
1964-06-09
1964-06-10
1964-06-11
1964-06-12
1964-06-13
1964-06-14
1964-06-15
1964-06-16
1964-06-17
1964-06-18
1964-06-19
1964-06-20
1964-06-21
1964-06-22
1964-06-23
1964-06-24
1964-06-25
1964-06-26
1964-06-27
1964-06-28
1964-06-29
1964-06-30
1964-07-01
1964-07-02
1964-07-03
1964-07-04
1964-07-05
1964-07-06
1964-07-07
1964-07-08
1964-07-09
1964-07-10
1964-07-11
1964-07-12
1964-07-13
1964-07-14
1964-07-15
1964-07-16
1964-07-17
1964-07-18
[truncated: 18,793 more rows]

## Sheet: Temperature
	637330			637140			637100			637090			637370
	TEMP	MAX	MIN	TEMP	MAX	MIN	TEMP	MAX	MIN	TEMP	MAX	MIN	TEMP	MAX	MIN
1957-01-01	The data can be downloaded freely from https://www.ncdc.noaa.gov/cdo-web/datasets .
1957-01-02	Or to receive the data in order to verify the analysis and model results of this paper, please feel free contact us (T.A.Bogaard@tudelft.nl).
1957-01-03
1957-01-04
1957-01-05
1957-01-06
1957-01-07
1957-01-08
1957-01-09
1957-01-10
1957-01-11
1957-01-12
1957-01-13
1957-01-14
1957-01-15
1957-01-16
1957-01-17
1957-01-18
1957-01-19
1957-01-20
1957-01-21
1957-01-22
1957-01-23
1957-01-24
1957-01-25
1957-01-26
1957-01-27
1957-01-28
1957-01-29
1957-01-30
1957-01-31
1957-02-01
1957-02-02
1957-02-03
1957-02-04
1957-02-05
1957-02-06
1957-02-07
1957-02-08
1957-02-09
1957-02-10
1957-02-11
1957-02-12
1957-02-13
1957-02-14
1957-02-15
1957-02-16
1957-02-17
1957-02-18
1957-02-19
1957-02-20
1957-02-21
1957-02-22
1957-02-23
1957-02-24
1957-02-25
1957-02-26
1957-02-27
1957-02-28
1957-03-01
1957-03-02
1957-03-03
1957-03-04
1957-03-05
1957-03-06
1957-03-07
1957-03-08
1957-03-09
1957-03-10
1957-03-11
1957-03-12
1957-03-13
1957-03-14
1957-03-15
1957-03-16
1957-03-17
1957-03-18
1957-03-19
1957-03-20
1957-03-21
1957-03-22
1957-03-23
1957-03-24
1957-03-25
1957-03-26
1957-03-27
1957-03-28
1957-03-29
1957-03-30
1957-03-31
1957-04-01
1957-04-02
1957-04-03
1957-04-04
1957-04-05
1957-04-06
1957-04-07
1957-04-08
1957-04-09
1957-04-10
1957-04-11
1957-04-12
1957-04-13
1957-04-14
1957-04-15
1957-04-16
1957-04-17
1957-04-18
1957-04-19
1957-04-20
1957-04-21
1957-04-22
1957-04-23
1957-04-24
1957-04-25
1957-04-26
1957-04-27
1957-04-28
1957-04-29
1957-04-30
1957-05-01
1957-05-02
1957-05-03
1957-05-04
1957-05-05
1957-05-06
1957-05-07
1957-05-08
1957-05-09
1957-05-10
1957-05-11
1957-05-12
1957-05-13
1957-05-14
1957-05-15
1957-05-16
1957-05-17
1957-05-18
1957-05-19
1957-05-20
1957-05-21
1957-05-22
1957-05-23
1957-05-24
1957-05-25
1957-05-26
1957-05-27
1957-05-28
1957-05-29
1957-05-30
1957-05-31
1957-06-01
1957-06-02
1957-06-03
1957-06-04
1957-06-05
1957-06-06
1957-06-07
1957-06-08
1957-06-09
1957-06-10
1957-06-11
1957-06-12
1957-06-13
1957-06-14
1957-06-15
1957-06-16
1957-06-17
1957-06-18
1957-06-19
1957-06-20
1957-06-21
1957-06-22
1957-06-23
1957-06-24
1957-06-25
1957-06-26
1957-06-27
1957-06-28
1957-06-29
1957-06-30
1957-07-01
1957-07-02
1957-07-03
1957-07-04
1957-07-05
1957-07-06
1957-07-07
1957-07-08
1957-07-09
1957-07-10
1957-07-11
1957-07-12
1957-07-13
1957-07-14
1957-07-15
1957-07-16
1957-07-17
1957-07-18
1957-07-19
1957-07-20
1957-07-21
1957-07-22
1957-07-23
1957-07-24
1957-07-25
1957-07-26
1957-07-27
1957-07-28
1957-07-29
1957-07-30
1957-07-31
1957-08-01
1957-08-02
1957-08-03
1957-08-04
1957-08-05
1957-08-06
1957-08-07
1957-08-08
1957-08-09
1957-08-10
1957-08-11
1957-08-12
1957-08-13
1957-08-14
1957-08-15
1957-08-16
1957-08-17
1957-08-18
1957-08-19
1957-08-20
1957-08-21
1957-08-22
1957-08-23
1957-08-24
1957-08-25
1957-08-26
1957-08-27
1957-08-28
1957-08-29
1957-08-30
1957-08-31
1957-09-01
1957-09-02
1957-09-03
1957-09-04
1957-09-05
1957-09-06
1957-09-07
1957-09-08
1957-09-09
1957-09-10
1957-09-11
1957-09-12
1957-09-13
1957-09-14
1957-09-15
1957-09-16
1957-09-17
1957-09-18
1957-09-19
1957-09-20
1957-09-21
1957-09-22
1957-09-23
1957-09-24
1957-09-25
1957-09-26
1957-09-27
1957-09-28
1957-09-29
1957-09-30
1957-10-01
1957-10-02
1957-10-03
1957-10-04
1957-10-05
1957-10-06
1957-10-07
1957-10-08
1957-10-09
1957-10-10
1957-10-11
1957-10-12
1957-10-13
1957-10-14
1957-10-15
1957-10-16
1957-10-17
1957-10-18
1957-10-19
1957-10-20
1957-10-21
1957-10-22
1957-10-23
1957-10-24
1957-10-25
1957-10-26
1957-10-27
1957-10-28
1957-10-29
1957-10-30
1957-10-31
1957-11-01
1957-11-02
1957-11-03
1957-11-04
1957-11-05
1957-11-06
1957-11-07
1957-11-08
1957-11-09
1957-11-10
1957-11-11
1957-11-12
1957-11-13
1957-11-14
1957-11-15
1957-11-16
1957-11-17
1957-11-18
1957-11-19
1957-11-20
1957-11-21
1957-11-22
1957-11-23
1957-11-24
1957-11-25
1957-11-26
1957-11-27
1957-11-28
1957-11-29
1957-11-30
1957-12-01
1957-12-02
1957-12-03
1957-12-04
1957-12-05
1957-12-06
1957-12-07
1957-12-08
1957-12-09
1957-12-10
1957-12-11
1957-12-12
1957-12-13
1957-12-14
1957-12-15
1957-12-16
1957-12-17
1957-12-18
1957-12-19
1957-12-20
1957-12-21
1957-12-22
1957-12-23
1957-12-24
1957-12-25
1957-12-26
1957-12-27
1957-12-28
1957-12-29
1957-12-30
1957-12-31
1958-01-01
1958-01-02
1958-01-03
1958-01-04
1958-01-05
1958-01-06
1958-01-07
1958-01-08
1958-01-09
1958-01-10
1958-01-11
1958-01-12
1958-01-13
1958-01-14
1958-01-15
1958-01-16
1958-01-17
1958-01-18
1958-01-19
1958-01-20
1958-01-21
1958-01-22
1958-01-23
1958-01-24
1958-01-25
1958-01-26
1958-01-27
1958-01-28
1958-01-29
1958-01-30
1958-01-31
1958-02-01
1958-02-02
1958-02-03
1958-02-04
1958-02-05
1958-02-06
1958-02-07
1958-02-08
1958-02-09
1958-02-10
1958-02-11
1958-02-12
1958-02-13
1958-02-14
1958-02-15
1958-02-16
1958-02-17
1958-02-18
1958-02-19
1958-02-20
1958-02-21
1958-02-22
1958-02-23
1958-02-24
1958-02-25
1958-02-26
1958-02-27
1958-02-28
1958-03-01
1958-03-02
1958-03-03
1958-03-04
1958-03-05
1958-03-06
1958-03-07
1958-03-08
1958-03-09
1958-03-10
1958-03-11
1958-03-12
1958-03-13
1958-03-14
1958-03-15
1958-03-16
1958-03-17
1958-03-18
1958-03-19
1958-03-20
1958-03-21
1958-03-22
1958-03-23
1958-03-24
1958-03-25
1958-03-26
1958-03-27
1958-03-28
1958-03-29
1958-03-30
1958-03-31
1958-04-01
1958-04-02
1958-04-03
1958-04-04
1958-04-05
1958-04-06
1958-04-07
1958-04-08
1958-04-09
1958-04-10
1958-04-11
1958-04-12
1958-04-13
1958-04-14
1958-04-15
1958-04-16
1958-04-17
1958-04-18
1958-04-19
1958-04-20
1958-04-21
1958-04-22
1958-04-23
1958-04-24
1958-04-25
1958-04-26
1958-04-27
1958-04-28
1958-04-29
1958-04-30
1958-05-01
1958-05-02
1958-05-03
1958-05-04
1958-05-05
1958-05-06
1958-05-07
1958-05-08
1958-05-09
1958-05-10
1958-05-11
1958-05-12
1958-05-13
1958-05-14
1958-05-15
1958-05-16
1958-05-17
1958-05-18
1958-05-19
1958-05-20
1958-05-21
1958-05-22
1958-05-23
1958-05-24
1958-05-25
1958-05-26
1958-05-27
1958-05-28
1958-05-29
1958-05-30
1958-05-31
1958-06-01
1958-06-02
1958-06-03
1958-06-04
1958-06-05
1958-06-06
1958-06-07
1958-06-08
1958-06-09
1958-06-10
1958-06-11
1958-06-12
1958-06-13
1958-06-14
1958-06-15
1958-06-16
1958-06-17
1958-06-18
1958-06-19
1958-06-20
1958-06-21
1958-06-22
1958-06-23
1958-06-24
1958-06-25
1958-06-26
1958-06-27
1958-06-28
1958-06-29
1958-06-30
1958-07-01
1958-07-02
1958-07-03
1958-07-04
1958-07-05
1958-07-06
1958-07-07
1958-07-08
1958-07-09
1958-07-10
1958-07-11
1958-07-12
1958-07-13
1958-07-14
1958-07-15
1958-07-16
1958-07-17
1958-07-18
1958-07-19
1958-07-20
1958-07-21
1958-07-22
1958-07-23
1958-07-24
1958-07-25
1958-07-26
1958-07-27
1958-07-28
1958-07-29
1958-07-30
1958-07-31
1958-08-01
1958-08-02
1958-08-03
1958-08-04
1958-08-05
1958-08-06
1958-08-07
1958-08-08
1958-08-09
1958-08-10
1958-08-11
1958-08-12
1958-08-13
1958-08-14
1958-08-15
1958-08-16
1958-08-17
1958-08-18
1958-08-19
1958-08-20
1958-08-21
1958-08-22
1958-08-23
1958-08-24
1958-08-25
1958-08-26
1958-08-27
1958-08-28
1958-08-29
1958-08-30
1958-08-31
1958-09-01
1958-09-02
1958-09-03
1958-09-04
1958-09-05
1958-09-06
1958-09-07
1958-09-08
1958-09-09
1958-09-10
1958-09-11
1958-09-12
1958-09-13
1958-09-14
1958-09-15
1958-09-16
1958-09-17
1958-09-18
1958-09-19
1958-09-20
1958-09-21
1958-09-22
1958-09-23
1958-09-24
1958-09-25
1958-09-26
1958-09-27
1958-09-28
1958-09-29
1958-09-30
1958-10-01
1958-10-02
1958-10-03
1958-10-04
1958-10-05
1958-10-06
1958-10-07
1958-10-08
1958-10-09
1958-10-10
1958-10-11
1958-10-12
1958-10-13
1958-10-14
1958-10-15
1958-10-16
1958-10-17
1958-10-18
1958-10-19
1958-10-20
1958-10-21
1958-10-22
1958-10-23
1958-10-24
1958-10-25
1958-10-26
1958-10-27
1958-10-28
1958-10-29
1958-10-30
1958-10-31
1958-11-01
1958-11-02
1958-11-03
1958-11-04
1958-11-05
1958-11-06
1958-11-07
1958-11-08
1958-11-09
1958-11-10
1958-11-11
1958-11-12
1958-11-13
1958-11-14
1958-11-15
1958-11-16
1958-11-17
1958-11-18
1958-11-19
1958-11-20
1958-11-21
1958-11-22
1958-11-23
1958-11-24
1958-11-25
1958-11-26
1958-11-27
1958-11-28
1958-11-29
1958-11-30
1958-12-01
1958-12-02
1958-12-03
1958-12-04
1958-12-05
1958-12-06
1958-12-07
1958-12-08
1958-12-09
1958-12-10
1958-12-11
1958-12-12
1958-12-13
1958-12-14
1958-12-15
1958-12-16
1958-12-17
1958-12-18
1958-12-19
1958-12-20
1958-12-21
1958-12-22
1958-12-23
1958-12-24
1958-12-25
1958-12-26
1958-12-27
1958-12-28
1958-12-29
1958-12-30
1958-12-31
1959-01-01
1959-01-02
1959-01-03
1959-01-04
1959-01-05
1959-01-06
1959-01-07
1959-01-08
1959-01-09
1959-01-10
1959-01-11
1959-01-12
1959-01-13
1959-01-14
1959-01-15
1959-01-16
1959-01-17
1959-01-18
1959-01-19
1959-01-20
1959-01-21
1959-01-22
1959-01-23
1959-01-24
1959-01-25
1959-01-26
1959-01-27
1959-01-28
1959-01-29
1959-01-30
1959-01-31
1959-02-01
1959-02-02
1959-02-03
1959-02-04
1959-02-05
1959-02-06
1959-02-07
1959-02-08
1959-02-09
1959-02-10
1959-02-11
1959-02-12
1959-02-13
1959-02-14
1959-02-15
1959-02-16
1959-02-17
1959-02-18
1959-02-19
1959-02-20
1959-02-21
1959-02-22
1959-02-23
1959-02-24
1959-02-25
1959-02-26
1959-02-27
1959-02-28
1959-03-01
1959-03-02
1959-03-03
1959-03-04
1959-03-05
1959-03-06
1959-03-07
1959-03-08
1959-03-09
1959-03-10
1959-03-11
1959-03-12
1959-03-13
1959-03-14
1959-03-15
1959-03-16
1959-03-17
1959-03-18
1959-03-19
1959-03-20
1959-03-21
1959-03-22
1959-03-23
1959-03-24
1959-03-25
1959-03-26
1959-03-27
1959-03-28
1959-03-29
1959-03-30
1959-03-31
1959-04-01
1959-04-02
1959-04-03
1959-04-04
1959-04-05
1959-04-06
1959-04-07
1959-04-08
1959-04-09
1959-04-10
1959-04-11
1959-04-12
1959-04-13
1959-04-14
1959-04-15
1959-04-16
1959-04-17
1959-04-18
1959-04-19
1959-04-20
1959-04-21
1959-04-22
1959-04-23
1959-04-24
1959-04-25
1959-04-26
1959-04-27
1959-04-28
1959-04-29
1959-04-30
1959-05-01
1959-05-02
1959-05-03
1959-05-04
1959-05-05
1959-05-06
1959-05-07
1959-05-08
1959-05-09
1959-05-10
1959-05-11
1959-05-12
1959-05-13
1959-05-14
1959-05-15
1959-05-16
1959-05-17
1959-05-18
1959-05-19
1959-05-20
1959-05-21
1959-05-22
1959-05-23
1959-05-24
1959-05-25
1959-05-26
1959-05-27
1959-05-28
1959-05-29
1959-05-30
1959-05-31
1959-06-01
1959-06-02
1959-06-03
1959-06-04
1959-06-05
1959-06-06
1959-06-07
1959-06-08
1959-06-09
1959-06-10
1959-06-11
1959-06-12
1959-06-13
1959-06-14
1959-06-15
1959-06-16
1959-06-17
1959-06-18
1959-06-19
1959-06-20
1959-06-21
1959-06-22
1959-06-23
1959-06-24
1959-06-25
1959-06-26
1959-06-27
1959-06-28
1959-06-29
1959-06-30
1959-07-01
1959-07-02
1959-07-03
1959-07-04
1959-07-05
1959-07-06
1959-07-07
1959-07-08
1959-07-09
1959-07-10
1959-07-11
1959-07-12
1959-07-13
1959-07-14
1959-07-15
1959-07-16
1959-07-17
1959-07-18
1959-07-19
1959-07-20
1959-07-21
1959-07-22
1959-07-23
1959-07-24
1959-07-25
1959-07-26
1959-07-27
1959-07-28
1959-07-29
1959-07-30
1959-07-31
1959-08-01
1959-08-02
1959-08-03
1959-08-04
1959-08-05
1959-08-06
1959-08-07
1959-08-08
1959-08-09
1959-08-10
1959-08-11
1959-08-12
1959-08-13
1959-08-14
1959-08-15
1959-08-16
1959-08-17
1959-08-18
1959-08-19
1959-08-20
1959-08-21
1959-08-22
1959-08-23
1959-08-24
1959-08-25
1959-08-26
1959-08-27
1959-08-28
1959-08-29
1959-08-30
1959-08-31
1959-09-01
1959-09-02
1959-09-03
1959-09-04
1959-09-05
1959-09-06
1959-09-07
1959-09-08
1959-09-09
1959-09-10
1959-09-11
1959-09-12
1959-09-13
1959-09-14
1959-09-15
1959-09-16
1959-09-17
1959-09-18
1959-09-19
1959-09-20
1959-09-21
1959-09-22
1959-09-23
1959-09-24
1959-09-25
1959-09-26
1959-09-27
1959-09-28
1959-09-29
1959-09-30
1959-10-01
1959-10-02
1959-10-03
1959-10-04
1959-10-05
1959-10-06
1959-10-07
1959-10-08
1959-10-09
1959-10-10
1959-10-11
1959-10-12
1959-10-13
1959-10-14
1959-10-15
1959-10-16
1959-10-17
1959-10-18
1959-10-19
1959-10-20
1959-10-21
1959-10-22
1959-10-23
1959-10-24
1959-10-25
1959-10-26
1959-10-27
1959-10-28
1959-10-29
1959-10-30
1959-10-31
1959-11-01
1959-11-02
1959-11-03
1959-11-04
1959-11-05
1959-11-06
1959-11-07
1959-11-08
1959-11-09
1959-11-10
1959-11-11
1959-11-12
1959-11-13
1959-11-14
1959-11-15
1959-11-16
1959-11-17
1959-11-18
1959-11-19
1959-11-20
1959-11-21
1959-11-22
1959-11-23
1959-11-24
1959-11-25
1959-11-26
1959-11-27
1959-11-28
1959-11-29
1959-11-30
1959-12-01
1959-12-02
1959-12-03
1959-12-04
1959-12-05
1959-12-06
1959-12-07
1959-12-08
1959-12-09
1959-12-10
1959-12-11
1959-12-12
1959-12-13
1959-12-14
1959-12-15
1959-12-16
1959-12-17
1959-12-18
1959-12-19
1959-12-20
1959-12-21
1959-12-22
1959-12-23
1959-12-24
1959-12-25
1959-12-26
1959-12-27
1959-12-28
1959-12-29
1959-12-30
1959-12-31
1960-01-01
1960-01-02
1960-01-03
1960-01-04
1960-01-05
1960-01-06
1960-01-07
1960-01-08
1960-01-09
1960-01-10
1960-01-11
1960-01-12
1960-01-13
1960-01-14
1960-01-15
1960-01-16
1960-01-17
1960-01-18
1960-01-19
1960-01-20
1960-01-21
1960-01-22
1960-01-23
1960-01-24
1960-01-25
1960-01-26
1960-01-27
1960-01-28
1960-01-29
1960-01-30
1960-01-31
1960-02-01
1960-02-02
1960-02-03
1960-02-04
1960-02-05
1960-02-06
1960-02-07
1960-02-08
1960-02-09
1960-02-10
1960-02-11
1960-02-12
1960-02-13
1960-02-14
1960-02-15
1960-02-16
1960-02-17
1960-02-18
1960-02-19
1960-02-20
1960-02-21
1960-02-22
1960-02-23
1960-02-24
1960-02-25
1960-02-26
1960-02-27
1960-02-28
1960-02-29
1960-03-01
1960-03-02
1960-03-03
1960-03-04
1960-03-05
1960-03-06
1960-03-07
1960-03-08
1960-03-09
1960-03-10
1960-03-11
1960-03-12
1960-03-13
1960-03-14
1960-03-15
1960-03-16
1960-03-17
1960-03-18
1960-03-19
1960-03-20
1960-03-21
1960-03-22
1960-03-23
1960-03-24
1960-03-25
1960-03-26
1960-03-27
1960-03-28
1960-03-29
1960-03-30
1960-03-31
1960-04-01
1960-04-02
1960-04-03
1960-04-04
1960-04-05
1960-04-06
1960-04-07
1960-04-08
1960-04-09
1960-04-10
1960-04-11
1960-04-12
1960-04-13
1960-04-14
1960-04-15
1960-04-16
1960-04-17
1960-04-18
1960-04-19
1960-04-20
1960-04-21
1960-04-22
1960-04-23
1960-04-24
1960-04-25
1960-04-26
1960-04-27
1960-04-28
1960-04-29
1960-04-30
1960-05-01
1960-05-02
1960-05-03
1960-05-04
1960-05-05
1960-05-06
1960-05-07
1960-05-08
1960-05-09
1960-05-10
1960-05-11
1960-05-12
1960-05-13
1960-05-14
1960-05-15
1960-05-16
1960-05-17
1960-05-18
1960-05-19
1960-05-20
1960-05-21
1960-05-22
1960-05-23
1960-05-24
1960-05-25
1960-05-26
1960-05-27
1960-05-28
1960-05-29
1960-05-30
1960-05-31
1960-06-01
1960-06-02
1960-06-03
1960-06-04
1960-06-05
1960-06-06
1960-06-07
1960-06-08
1960-06-09
1960-06-10
1960-06-11
1960-06-12
1960-06-13
1960-06-14
1960-06-15
1960-06-16
1960-06-17
1960-06-18
1960-06-19
1960-06-20
1960-06-21
1960-06-22
1960-06-23
1960-06-24
1960-06-25
1960-06-26
1960-06-27
1960-06-28
1960-06-29
1960-06-30
1960-07-01
1960-07-02
1960-07-03
1960-07-04
1960-07-05
1960-07-06
1960-07-07
1960-07-08
1960-07-09
1960-07-10
1960-07-11
1960-07-12
1960-07-13
1960-07-14
1960-07-15
1960-07-16
1960-07-17
1960-07-18
1960-07-19
1960-07-20
1960-07-21
1960-07-22
1960-07-23
1960-07-24
1960-07-25
1960-07-26
1960-07-27
1960-07-28
1960-07-29
1960-07-30
1960-07-31
1960-08-01
1960-08-02
1960-08-03
1960-08-04
1960-08-05
1960-08-06
1960-08-07
1960-08-08
1960-08-09
1960-08-10
1960-08-11
1960-08-12
1960-08-13
1960-08-14
1960-08-15
1960-08-16
1960-08-17
1960-08-18
1960-08-19
1960-08-20
1960-08-21
1960-08-22
1960-08-23
1960-08-24
1960-08-25
1960-08-26
1960-08-27
1960-08-28
1960-08-29
1960-08-30
1960-08-31
1960-09-01
1960-09-02
1960-09-03
1960-09-04
1960-09-05
1960-09-06
1960-09-07
1960-09-08
1960-09-09
1960-09-10
1960-09-11
1960-09-12
1960-09-13
1960-09-14
1960-09-15
1960-09-16
1960-09-17
1960-09-18
1960-09-19
1960-09-20
1960-09-21
1960-09-22
1960-09-23
1960-09-24
1960-09-25
1960-09-26
1960-09-27
1960-09-28
1960-09-29
1960-09-30
1960-10-01
1960-10-02
1960-10-03
1960-10-04
1960-10-05
1960-10-06
1960-10-07
1960-10-08
1960-10-09
1960-10-10
1960-10-11
1960-10-12
1960-10-13
1960-10-14
1960-10-15
1960-10-16
1960-10-17
1960-10-18
1960-10-19
1960-10-20
1960-10-21
1960-10-22
1960-10-23
1960-10-24
1960-10-25
1960-10-26
1960-10-27
1960-10-28
1960-10-29
1960-10-30
1960-10-31
1960-11-01
1960-11-02
1960-11-03
1960-11-04
1960-11-05
1960-11-06
1960-11-07
1960-11-08
1960-11-09
1960-11-10
1960-11-11
1960-11-12
1960-11-13
1960-11-14
1960-11-15
1960-11-16
1960-11-17
1960-11-18
1960-11-19
1960-11-20
1960-11-21
1960-11-22
1960-11-23
1960-11-24
1960-11-25
1960-11-26
1960-11-27
1960-11-28
1960-11-29
1960-11-30
1960-12-01
1960-12-02
1960-12-03
1960-12-04
1960-12-05
1960-12-06
1960-12-07
1960-12-08
1960-12-09
1960-12-10
1960-12-11
1960-12-12
1960-12-13
1960-12-14
1960-12-15
1960-12-16
1960-12-17
1960-12-18
1960-12-19
1960-12-20
1960-12-21
1960-12-22
1960-12-23
1960-12-24
1960-12-25
1960-12-26
1960-12-27
1960-12-28
1960-12-29
1960-12-30
1960-12-31
1961-01-01
1961-01-02
1961-01-03
1961-01-04
1961-01-05
1961-01-06
1961-01-07
1961-01-08
1961-01-09
1961-01-10
1961-01-11
1961-01-12
1961-01-13
1961-01-14
1961-01-15
1961-01-16
1961-01-17
1961-01-18
1961-01-19
1961-01-20
1961-01-21
1961-01-22
1961-01-23
1961-01-24
1961-01-25
1961-01-26
1961-01-27
1961-01-28
1961-01-29
1961-01-30
1961-01-31
1961-02-01
1961-02-02
1961-02-03
1961-02-04
1961-02-05
1961-02-06
1961-02-07
1961-02-08
1961-02-09
1961-02-10
1961-02-11
1961-02-12
1961-02-13
1961-02-14
1961-02-15
1961-02-16
1961-02-17
1961-02-18
1961-02-19
1961-02-20
1961-02-21
1961-02-22
1961-02-23
1961-02-24
1961-02-25
1961-02-26
1961-02-27
1961-02-28
1961-03-01
1961-03-02
1961-03-03
1961-03-04
1961-03-05
1961-03-06
1961-03-07
1961-03-08
1961-03-09
1961-03-10
1961-03-11
1961-03-12
1961-03-13
1961-03-14
1961-03-15
1961-03-16
1961-03-17
1961-03-18
1961-03-19
1961-03-20
1961-03-21
1961-03-22
1961-03-23
1961-03-24
1961-03-25
1961-03-26
1961-03-27
1961-03-28
1961-03-29
1961-03-30
1961-03-31
1961-04-01
1961-04-02
1961-04-03
1961-04-04
1961-04-05
1961-04-06
1961-04-07
1961-04-08
1961-04-09
1961-04-10
1961-04-11
1961-04-12
1961-04-13
1961-04-14
1961-04-15
1961-04-16
1961-04-17
1961-04-18
1961-04-19
1961-04-20
1961-04-21
1961-04-22
1961-04-23
1961-04-24
1961-04-25
1961-04-26
1961-04-27
1961-04-28
1961-04-29
1961-04-30
1961-05-01
1961-05-02
1961-05-03
1961-05-04
1961-05-05
1961-05-06
1961-05-07
1961-05-08
1961-05-09
1961-05-10
1961-05-11
1961-05-12
1961-05-13
1961-05-14
1961-05-15
1961-05-16
1961-05-17
1961-05-18
1961-05-19
1961-05-20
1961-05-21
1961-05-22
1961-05-23
1961-05-24
1961-05-25
1961-05-26
1961-05-27
1961-05-28
1961-05-29
1961-05-30
1961-05-31
1961-06-01
1961-06-02
1961-06-03
1961-06-04
1961-06-05
1961-06-06
1961-06-07
1961-06-08
1961-06-09
1961-06-10
1961-06-11
1961-06-12
1961-06-13
1961-06-14
1961-06-15
1961-06-16
1961-06-17
1961-06-18
1961-06-19
1961-06-20
1961-06-21
1961-06-22
1961-06-23
1961-06-24
1961-06-25
1961-06-26
1961-06-27
1961-06-28
1961-06-29
1961-06-30
1961-07-01
1961-07-02
1961-07-03
1961-07-04
1961-07-05
1961-07-06
1961-07-07
1961-07-08
1961-07-09
1961-07-10
1961-07-11
1961-07-12
1961-07-13
1961-07-14
1961-07-15
1961-07-16
1961-07-17
1961-07-18
1961-07-19
1961-07-20
1961-07-21
1961-07-22
1961-07-23
1961-07-24
1961-07-25
1961-07-26
1961-07-27
1961-07-28
1961-07-29
1961-07-30
1961-07-31
1961-08-01
1961-08-02
1961-08-03
1961-08-04
1961-08-05
1961-08-06
1961-08-07
1961-08-08
1961-08-09
1961-08-10
1961-08-11
1961-08-12
1961-08-13
1961-08-14
1961-08-15
1961-08-16
1961-08-17
1961-08-18
1961-08-19
1961-08-20
1961-08-21
1961-08-22
1961-08-23
1961-08-24
1961-08-25
1961-08-26
1961-08-27
1961-08-28
1961-08-29
1961-08-30
1961-08-31
1961-09-01
1961-09-02
1961-09-03
1961-09-04
1961-09-05
1961-09-06
1961-09-07
1961-09-08
1961-09-09
1961-09-10
1961-09-11
1961-09-12
1961-09-13
1961-09-14
1961-09-15
1961-09-16
1961-09-17
1961-09-18
1961-09-19
1961-09-20
1961-09-21
1961-09-22
1961-09-23
1961-09-24
1961-09-25
1961-09-26
1961-09-27
1961-09-28
1961-09-29
1961-09-30
1961-10-01
1961-10-02
1961-10-03
1961-10-04
1961-10-05
1961-10-06
1961-10-07
1961-10-08
1961-10-09
1961-10-10
1961-10-11
1961-10-12
1961-10-13
1961-10-14
1961-10-15
1961-10-16
1961-10-17
1961-10-18
1961-10-19
1961-10-20
1961-10-21
1961-10-22
1961-10-23
1961-10-24
1961-10-25
1961-10-26
1961-10-27
1961-10-28
1961-10-29
1961-10-30
1961-10-31
1961-11-01
1961-11-02
1961-11-03
1961-11-04
1961-11-05
1961-11-06
1961-11-07
1961-11-08
1961-11-09
1961-11-10
1961-11-11
1961-11-12
1961-11-13
1961-11-14
1961-11-15
1961-11-16
1961-11-17
1961-11-18
1961-11-19
1961-11-20
1961-11-21
1961-11-22
1961-11-23
1961-11-24
1961-11-25
1961-11-26
1961-11-27
1961-11-28
1961-11-29
1961-11-30
1961-12-01
1961-12-02
1961-12-03
1961-12-04
1961-12-05
1961-12-06
1961-12-07
1961-12-08
1961-12-09
1961-12-10
1961-12-11
1961-12-12
1961-12-13
1961-12-14
1961-12-15
1961-12-16
1961-12-17
1961-12-18
1961-12-19
1961-12-20
1961-12-21
1961-12-22
1961-12-23
1961-12-24
1961-12-25
1961-12-26
1961-12-27
1961-12-28
1961-12-29
1961-12-30
1961-12-31
1962-01-01
1962-01-02
1962-01-03
1962-01-04
1962-01-05
1962-01-06
1962-01-07
1962-01-08
1962-01-09
1962-01-10
1962-01-11
1962-01-12
1962-01-13
1962-01-14
1962-01-15
1962-01-16
1962-01-17
1962-01-18
1962-01-19
1962-01-20
1962-01-21
1962-01-22
1962-01-23
1962-01-24
1962-01-25
1962-01-26
1962-01-27
1962-01-28
1962-01-29
1962-01-30
1962-01-31
1962-02-01
1962-02-02
1962-02-03
1962-02-04
1962-02-05
1962-02-06
1962-02-07
1962-02-08
1962-02-09
1962-02-10
1962-02-11
1962-02-12
1962-02-13
1962-02-14
1962-02-15
1962-02-16
1962-02-17
1962-02-18
1962-02-19
1962-02-20
1962-02-21
1962-02-22
1962-02-23
1962-02-24
1962-02-25
1962-02-26
1962-02-27
1962-02-28
1962-03-01
1962-03-02
1962-03-03
1962-03-04
1962-03-05
1962-03-06
1962-03-07
1962-03-08
1962-03-09
1962-03-10
1962-03-11
1962-03-12
1962-03-13
1962-03-14
1962-03-15
1962-03-16
1962-03-17
1962-03-18
1962-03-19
1962-03-20
1962-03-21
1962-03-22
1962-03-23
1962-03-24
1962-03-25
1962-03-26
1962-03-27
1962-03-28
1962-03-29
1962-03-30
1962-03-31
1962-04-01
1962-04-02
1962-04-03
1962-04-04
1962-04-05
1962-04-06
1962-04-07
1962-04-08
1962-04-09
1962-04-10
1962-04-11
1962-04-12
1962-04-13
1962-04-14
1962-04-15
1962-04-16
1962-04-17
1962-04-18
1962-04-19
1962-04-20
1962-04-21
1962-04-22
1962-04-23
1962-04-24
1962-04-25
1962-04-26
1962-04-27
1962-04-28
1962-04-29
1962-04-30
1962-05-01
1962-05-02
1962-05-03
1962-05-04
1962-05-05
1962-05-06
1962-05-07
1962-05-08
1962-05-09
1962-05-10
1962-05-11
1962-05-12
1962-05-13
1962-05-14
1962-05-15
1962-05-16
1962-05-17
1962-05-18
1962-05-19
1962-05-20
1962-05-21
1962-05-22
1962-05-23
1962-05-24
1962-05-25
1962-05-26
1962-05-27
1962-05-28
1962-05-29
1962-05-30
1962-05-31
1962-06-01
1962-06-02
1962-06-03
1962-06-04
1962-06-05
1962-06-06
1962-06-07
1962-06-08
1962-06-09
1962-06-10
1962-06-11
1962-06-12
1962-06-13
1962-06-14
1962-06-15
1962-06-16
1962-06-17
1962-06-18
1962-06-19
1962-06-20
1962-06-21
[truncated: 18,991 more rows]
